# Supplementary material
Source: PubMed Central journal article supplement (PMC2812096)
Supplement: supp_17_1_168__1.pdf [file supp_17_1_168__1.pdf]

**Supplementary Table S1. *Mycobacterium tuberculosis* peptides binding to MHC class II**

monomers (HLA DRB1\*0101, DRB1\*1501, and DRB1\*0401)

| <b>HLA DR1</b>   | <b>HLA DR2</b>  | <b>HLA DR4</b>  | <b>HLA DR4 cont.</b> |
|------------------|-----------------|-----------------|----------------------|
| YNGWDINTPAFEWYY  | VPLRAIPLLGNPLAD | AYVRSCPGYTLDYNA | DVPRSGRRSVAVTPE      |
| AYVRSCPGYTLDYNA  | FAAFPSFAGLRPTFD | AYGSFVRTVSLPVGA | SEGGCWRTFLTCDAN      |
| FVYAYVRSCPGYTLD  | DGVGALLRYAATNRL | PYNHMEVGSPYAVEY | ELHRAGAALDYSALY      |
| AYGSFVRTVSLPVGA  | LLKQYGPLTPARAVA | FVYAYVRSCPGYTLD | AHLTGNAAMGAFTIP      |
| VMPVGGQSSFYSWDWY | IEYRSLARVYGAGTP | SEFAYGSFVRTVSLP | AVTITGTRIDIPLN       |
| DWDFNIRCFSPALV   | AMAAAATPYVGWLAA | MAKQAQYVAQLHVWA | VSARNTAVCAPTTGV      |
| ERPLLFALQCMPLNW  | YNTAIVGLGTPALVS | ERPLLFALQCMPLNW | NEDVIVRELTEVQGE      |
| HMEVGSPYAVEYVWG  | IRGTFKSVAVKAPGF | SSAGLMVAAAAPYVA | GLTPISLGSSSDLRV      |
| WDINTPAFEWYYQSG  | LTEGMRFDKGYISGY | LAAPVTHIWYFKGVP | LYRPLIFALYCLPLN      |
| PYNHMEVGSPYAVEY  | CAPILGGYPAVLTSF | DQILPVYAEYQQRSE | FLAEKTVKKNYVSRL      |
| VGGQSSFYSWDWYSPA | WIQKYIFPGGLLPST | DGRSEFAYGSFVRTV | LVLDTSSSFYRTPQG      |
| IEYRSLARVYGAGTP  | AFISGNFNSGVLWRG | VVPLIDLEMRRPTYV | TIPTGPIHIGLPLSL      |
| AVFNFPNGTHSWEY   | FVYAYVRSCPGYTLD | VAAASPYVAWMSVTA | LQGDVVKFRGFDNWE      |
| CPAVIAPLMPNRLQA  | QDLPLLVLRAIPLL  | GSSAMILAAYHPQQF | QVGDRVGGFSEGGCW      |
| EMWAQDAAVMYSYEG  | VVLPWDGRNHYLAAV | AITRVVVRDQPARQL | LLTIKSDDTVGRVKV      |
| LVRHDRAYSGYIPIL  | FLAEKTVKKNYVSRL | VGSPYAVEYVWGRQV | FPANSLNLDVFGVT       |
| AFISGNFNSGVLWRG  | TVLPQILPTIPLNI  | VGGRSIGVYAVNYPA | AKGLSTHEGALLSER      |
| WRGNYEGLFSYSYSL  | GLIFVIQVYRHMLSP | QGIEGTIHAVYYPG  | GQVTSGLTAGVWQGA      |
| GMPVLFWLDPYRPH   | GGTDSLPLPNIPLL  | YPYVVPLIDLEMRRP | FSLGPLVVPDIVIPA      |
| LLKQYGPLTPARAVA  | TVTTGIVSALNRPVS | EGLPPGSALLVVKRG | DVVQHVARRPGESPP      |
| VGSPYAVEYVWGRQV  | AIVGLGTPALVSGAG | SDPAYNINISLPSYY | ANVSRRAKVDVLIVH      |
| FTFMDYEQDWDGVAI  | AMILAAYHPQQFIYA | YRVLWQAAGPDTISG | GSLGLMTSVLMTADG      |
| DHTLYADVPELMPY   | ILGGYPAVLTSFVFS | GQQQTYSQQFDWRYP | LQSLGADIASEQAVL      |
| GQQQTYSQQFDWRYP  | FGNLLSFASLPTVGQ | VFLPSMTIGGQTYTI | VPDSSVPIIIPPTP       |
| NYEGLFSYSYSLDVP  | MVIPPIVFLPSMTIG | PTWWHSLPTDRPIIY | FQDPSGGSRVTVQVTL     |
| LAAPVTHIWYFKGVP  | MKAIADIEAYPQWIS | AVIPGYPVAGQVWEA | DGTSAAAKNTPGSIT      |
| ERFTGDEVTYRADIY  | SSAGLMVAAAAPYVA | AMILAAYHPQQFIYA | VRTAVVAANLPELVE      |
| EGGYVWACKNYDGDV  | PYIAIANAYWSPQAR | VANNTLWVYCGNGT  | LLLKVKEDIAAEYGR      |
| LATYAFLPIVRAFAE  | APLLATYAFLPIVRA | AHVVRPFVLRSLDP  | VPAARPDAVLDVRL       |
| GLIFVIQVYRHMLSP  | RPWHIGLYGNAGGLG | VKGAWVLARYDDGRP | VTPAARALPLTSLTS      |
| MNNLALWSRPVWDVE  | DTNIKLPNISASVP  | IRGTFKSVAVKAPGF | VIVRELTEVQGEVVD      |
| YIAIANAYWSPYAQR  | SYIITGGLGGLGLFF | GGNIMAHVSYVQSGM | DVAVLDVRLPDGNGI      |
| HGLIGFGESYMAGEW  | TVLPFTGLNTPLAVA | AYNINISLPSYYPDQ | KADLLVGVNVLSTI       |
| YAQQQQQTYSQQFDW  | DWDFNIRCFSPALV  | AFISGNFNSGVLWRG | VYATLGTSGGRNLLQ      |
| DMVAACLKWEGGYVW  | LADIAPMTPKVPPYS | QEQRAGGACTITVHP | VANIVDVATGEVLLT      |
| FRSGYLDVYQWTLIR  | LLSFASLPTVGQVTA | VAAAGYLVLRPSWSP | SRLGYLLDLAPKDLE      |
| LKWEGGYVWACKNYD  | YIAIANAYWSPYAQR | TAVQGIEGTIHAVY  | PLGLEGTVTTGIVSA      |
| LTEGMRFDKGYISGY  | DAADKVLGYRNWLGL | GRNHYLAAVYRTDLA | KSTDKTLHSVKVIPS      |
| GMRFDKGYISGYFVT  | LQGDVVKFRGFDNWE | GDPIEYRSLARVYGA | VGEAFVDSLTSQVGG      |
| MSAEQPTIHYTLTDE  | TVLPFTGIDFRLSPS | LKWEGGYVWACKNYD | TSALSGKLNPDVNLV      |
| GIPYIAIANAYWSPY  | LNHQITFSLGPLVVP | MTELVTKAFPPYVVV | AGFTAPATLLSALG       |
| VPIHDYGEINGQFFV  | LAAPVTHIWYFKGVP | RPGNYRYAINNSFGF | MRLSLTALSAGVGAV      |
| TWWDLSLPTDRPIVYA | VDNQCQSILGYVVRW | IAASYDAGVLTVRVA | DRLVSAATATGLPLR      |
| QDLPLLVLRAIPLL   | ERPLLFALQCMPLNW | EEGAYAFETLVRHDR | GFTIPGGTLIPQLPL      |
| VAAAGYLVLRPSWSP  | GMRFDKGYISGYFVT | IEYRSLARVYGAGTP | GNVNGVTLYTSGTG       |
| WDPWPPTTFGYHEFF  | MAKQAQYVAQLHVWA | HPIVFGHAVRIFYKD | ALVAAVRSKAPGATV      |
| WDGVAITLWTSQLYR  | LAAYHPQQFIYAGSL | SYDAGVLTVRVAGAY | DALRIVMADRPLTN       |
| CAMFTDLLAQPTPAW  | KADVYGNTLGLFPF  | GLIFVIQVYRHMLSP | LENADLSLLGKARKV      |

|                  |                  |                  |                  |
|------------------|------------------|------------------|------------------|
| DTGITYQAWQAQWNQ  | GDPIEYRSLARVYGA  | AMAAQLQAVPGAAQY  | IDHFGNRRRLRTVGEL |
| VYARVNPFGFIETPY  | MAAIATFAAPVALAA  | RACACLQPHDPAFTF  | GVLSNGVDISGMFNV  |
| QGIEGTIYHAVYYPG  | EVLLKIAQGRLFYNT  | MSDAVPQVGSQFGPY  | LRNVAAGANPLGLKR  |
| PSQFFPFTGLNSLTY  | ASPVAQSYLRNFLAA  | LPVTVIAATAGRNHL  | LGADIASEQAVLSSA  |
| TVLPFTGLNTPLAVA  | ITLFPGGTLFPANSL  | DWDFNIRCFSPALV   | YRTDLADRVDTLVGA  |
| NLVDTLNGGEYTVFA  | PEWNEGVKGAWVLAR  | CAPILGGYPAVLTSP  | LRVQPVLAIGSPLG   |
| EAGFRSGYLDVYQWT  | VGGRSIGVYAVNYPA  | FGFGGHNVAIAFGRY  | RSVCPMVVAPGGTFE  |
| VDNQCQSILGYVVRW  | EVQIGKFRVLVLTGP  | GINYRVLWQAAGPDT  | AYDQPATTVALGRSV  |
| FDKGYISGYFVTDPE  | ERVVVSQVLRSPGVY  | GYPVLTSPVSFLQR   | VGNVGLSTIAGRLLG  |
| PTWWHSLPTDRPIIY  | PSERFFGNLTQGRFY  | YIAIANAYWSPYAQR  | LFLHSGLIALLPDLA  |
| LYADVPELMPYDLP   | VSLPIFGFGGAPGFG  | VDSAGNVYVTSEGMY  | VTYELAVDLAVPMIG  |
| VERQIHEIVRAYEWA  | PGSIDAITLFPGGTL  | EGTYIHAVYYPGENQ  | PTIGTAVSARNTAVC  |
| CWQPITRDLWPAPYL  | RITPKDVIDVRSVTT  | EMECWAMQAYGAAYT  | VAQQFEAEIGRGSGL  |
| ADAYPTVDYAFQYDG  | PVALAAYPITGKLS   | LDPSRYEVHFACDPR  | LPLLAPMSEVAGRLA  |
| VGGRSIGVYAVNYPA  | EKTVKNYVSRLLAKL  | GSIVYKPKMHGPAE   | QLPDTNIIKLPNISA  |
| MTPKVPYYSATLFDP  | DTVIYSKYGGTEIKY  | TVLPFTGLNTPLAVA  | ADVSPHLLTHAVEQ   |
| PYAVEYVWGRQVGDN  | FTLPGERIHVVFRSD  | VTGCAETPGCVAYIG  | IGSPLGLEGTVTTGI  |
| SGNFSNGVLRWDYE   | TGIVSALNRPVSTTG  | YDRTQDVAVLQLRGA  | GDMAGYAGTLQSLGAG |
| GTEIKYNGEYLLIS   | VYARVNPFGFIETPY  | WAGRLRRLLEQASV   | LIATNLLGQNTPAIA  |
| ILYAVRWPDPWPTTF  | GILWRGNYEGLAGFS  | DETAWRNGDWYVARL  | VAVLQLRGAGGLPSA  |
| VYGNTRLGLFPFRRG  | WDGVAITLTSQLYR   | DNRGSQFYLAMYWAQ  | RTWRTGRQATLLAL   |
| VYLLDGLRAQDDYNG  | AAATPYVGWLAATAA  | AFEWYYQSGLSIVMP  | NQAKYVSDTRDVLRA  |
| AYAFETLVRHDRAYS  | AKFILVDVPRYIHLI  | ASPYVAVMSVTAGQA  | AGIAYDQPATTVALG  |
| LADIAPMTPKVPPYS  | IATFAAPVALAAYPI  | ERVVVSQVLRSPGVY  | DSSDCGTIRVGSFRG  |
| KADVYGNTRLGLFPF  | QLVASQSFAAKAGL   | AYETAYGLTVPPPVI  | PAIQALNRDFTLPE   |
| PEWNEGVKGAWVLAR  | VPHGESGK VIGIRVF | LDPSRYEVHFACDPRG | PIAVPSVTIPALTA   |
| SEFAYGSFVRTVSLP  | NEGVKGAWVLARYDD  | SITYNEWSFAQAQHL  | AGYAGTLQSLGAEIA  |
| AKFILVDVPRYIHLI  | LSRMPDLRCLILTSY  | STAYLQYTSGSTRTP  | VPEMFRELVLGAGS   |
| EGTYIHAVYYPGENQ  | AHVVRPFVLARSLDP  | LSRMPDLRCLILTSY  | VTIQPVVAAAATGDL  |
| GDPIEYRSLARVYGA  | AAVDAADKVLGYRNW  | AYSEAGFRSGYLDVY  | CPMVVAPGGTFESIT  |
| GLFSYSYSLDVPRIT  | PITRDLWPAPYL VMD | NARTADGINYRVLWQ  | GDMAGYTGTQSLGA   |
| DPAFTFMDYEQDWDG  | GTAFLRVLNRDRNYT  | RFGEMECWAMQAYGA  | FEETFEVTAAPVAV   |
| PSERFFGNLTQGRFY  | AYVRSCPGYTLDYNA  | CWPAAPRSVGVPLYL  | TCELSRVEDVLGLP   |
| AIAVNEAEYGEWMAQ  | IDAITLFPGGTLFPA  | QSAWQGDTGITYQAW  | PGTNWIGQAAEAYLN  |
| EYAEMWAQDAVMYS   | PILHRRRREFKARAA  | IATFAAPVALAAYPI  | SQLASMGSSQAQLIS  |
| MAKQAQYVAQLHVWA  | GGNIMAHVSYVQSGM  | TIFREPIVISNPRL   | LQGADLTVIGARDDL  |
| AQIADLDQEYDDFWD  | QEGLDQYGSIPPKS   | TYALTNATMPYVLEL  | INISLPSYYPDQKSL  |
| APLLATY AFLPIVRA | VSTLIVEPVMGPAAA  | YLQFRGEFTPKTQLT  | PRGTQAVVLKVYQNA  |
| DGMFKDEFERYEEEE  | GPGQEGLDQYGS IPL | QFNASPV AQSYLRNF | TPGYAQGQQQYTSQQ  |
| TDGSITYNEWSFAVG  | VAAAGYLVLRPSWSP  | DTGITYQAWQAQWNQ  | RYPPSPPPQPTQYRQ  |
| RPGNYRYAINNSFGF  | KLLAGSTTSTVLPFT  | VYARVNPFGFIETPY  | LNGLIQFDAAIQPGD  |
| PTCSQYAVDALTEYG  | GMPVLFWLDPYRPH   | HYLAAVYRTDLADR   | LMILIATNLLGQNT   |
| VSYGSVVSTLIVEPW  | GIRLVIVL VRRWPKV | REPIVISNPRLVPG   | VQRHPRSLFPFESL   |
| GLATAEDIRQWSYGE  | LIKDMLILPYDIRL   | SMAGSSAMILAAYHP  | LDGDEMTRVIWKLK   |
| ANHEYLGPVLWSPAG  | GTIRNILGGTIFREP  | GPPPATVIRLSYPY   | HGVGVKCATITPDEA  |
| SGNFSNGILWRGNFE  | GGEVSILQPFTVAPI  | EVQIGKFRVLVLTGP  | ASRMPVLSKTVEVTA  |
| AFEWYYQSGLSIVMP  | AYGSFVRTVSLPVGA  | EVLLKIAQGRLFYNT  | SIMAI VADIERYPEW |
| NEGVKGAWVLARYDD  | WAGRLRRLLEQASV   | KADVYGNTRLGLFPF  | IAATQA EYAEMWAQD |
| WTGDHHLVGFYSYI   | VVLKVYQNAGGTHPT  | GMRFDKGYISGYFVT  | GIEKAVEKVETLLK   |
| GYLDVYQWTLIREGP  | FGVRLVKLLYRLERP  | TFTIVAIGTYCPAVI  | SALLQTTDGSITYNE  |
| VEYVPSSEVDYMDVS  | SLGFGNLLSFASLPT  | RPKRPGSYPIVLATY  | PGERIHVVFRSDESG  |
| CRIFTDGDYTYLADV  | NCQSILGYVVRWVDQ  | RPWHIGLYGNAGGLG  | GPVVMQLMEAAKPFV  |
| AYNINISLPSYYPDQ  | PPIVFLPSMTIGGQT  | AGVLTVRVAGAYKAP  | SCGRVVRVTGRASAR  |
| VSPFGLFPDWDWAE   | NPIASIFAWTRGLQH  | CPAVIAPLMPNRLQA  | VSSPDVLT TYILLPS |

|                  |                  |                  |                  |
|------------------|------------------|------------------|------------------|
| FSNGVLWRGDYEWGLW | PSEDAQVAVYRAALA  | CWAMQAYGAAAYTLQE | LPFNGLYQPQGLAVD  |
| VFGHAVRIFYKDAFA  | NTARPHWIGLYGNAG  | DTVIYSKYGGTEIKY  | RMTTQDVEAITPQTL  |
| VDPRIYHILIPANVNA | KPAALVHGMFVALPA  | PSERFFGNLTQGRFY  | KIDRLLDVAGVQQGS  |
| LSGSEEDETAWRNGD  | HPIVFGHAVRIFYKD  | MVIPPVFLPSMTIG   | VAAAGFGHRVEIDL   |
| ILTRFGFSIPQLGFT  | AGVLTVRVAGAYKAP  | QAYRKPITYDTLWQA  | FTFMDYEQDWDGVAI  |
| NAFLTALTNAGIAYD  | VNKIRGTFKSVAVKA  | LNVMEEHQVRRVPVI  | GIDKVQPAVFAVQVA  |
| TATAGELARDSIYYV  | LHSVKVIPSRGAWLE  | VPHGESGK VIGIRVF | VHPLLGSHVRLTEEP  |
| EVLKIAQGRIFYNT   | PITISPITLFPQNF   | AGIPYIAIANAYWSP  | ADAIRAMSNAEHTGK  |
| TNDGVIFFNPGELL   | IGKFRVFLTGPKQG   | MTDVTGQVVLGWKVS  | ERAGAGVLLRTERLN  |
| EYKEVEILEADDEGY  | WSTPAVTIFPNGISI  | ARVYGAGTPCALGSA  | LGWNLCRIFTDGDHT  |
| DETAWRNGDWYVARL  | GPYQLLRLGRGGMG   | ERDRLVSRLLTLGW   | DEIREEVDNQCQIL   |
| LDVAEGDTVIYSKYG  | YNGWDINTPAFEWYY  | VDNQCQILGYVVRW   | GLSGGSTIPAIPGL   |
| DMLILPYLDIRLDYY  | AGIPYIAIANAYWSP  | PANHRYLGPVLWSPD  | QASSPMVGTLSGLGN  |
| YELNITSATYQSAIP  | SMAGSSAMILAAYHP  | EADLDVLDDEHGTVLL | LASGVLNSGVDISGM  |
| YNTAIVGLGTPALVS  | EIGKADVYGNTRLGL  | FETLVRHDRAYSYI   | SGFGNFGAGSSGWWN  |
| NARTADGINYRVLWQ  | PANHRYLGPVLWSPD  | GFVTAPTQGIHTG    | NSLLNLDVFGTPGA   |
| GILWRGNYEGLFSYS  | RKYIAADRKILNEIA  | LPVYAEYQQRSEKVL  | ANFGLFNSSYNTGI   |
| APTNAAFSKLPASTI  | CPAVIAPLMPNRLQA  | ATYEIVCSKYPDATT  | GVASTGLVNAGGFNT  |
| TSEIEPFIVWTSSGA  | DISVAARILAEFPDY  | VDTLNSGQYTVFAPT  | SITSRMAEINGMSRD  |
| DTGITYQGWQTQWNQ  | LKLISPYSDNAVFR   | PNVAITRVVVRDQPA  | VGLSTIAGRLLGSVP  |
| KYGGTEIKYNGEYEL  | HIGLYGNAGGLGPTQ  | SLPAALRACACLQPH  | LSGKLNPDVNLVDTL  |
| WAGRLRLLVEQASV   | NAFLTALTNAGIAYD  | PAPDGYPIIYIYAI   | DEDEGKRIPLDVAEG  |
| VTGCAETPGCVAYIG  | ENAMEQFVYAYVRSC  | ILGGYPAVLTSPVSF  | EHLRDDMVAACLKW   |
| PAPDGYPIIYIYAI   | PIQILPTIPLNIHQT  | APLLATYAFPIVRA   | YVWACKNYDGDVQSD  |
| AMILAAYHPQFIYA   | LPVTVIAATAGRNHL  | TATAGELARDSIYYV  | YEDIVGLERLYAENP  |
| VAMNNGMEDLLIWEF  | FRSGYLDVYQWTLIR  | YIGISFLDQASRGL   | LDQASQRGLGEAQLG  |
| IAAAEAEYEQIWAQD  | DRMFLAEKTVKNYVS  | LTNATMPYVLELADH  | WNLVVFVGPVAVTYN  |
| WQGDGTGITYQAWQAQ | EQQLRARQVAAAAGF  | GIDDSPAQVAVRWA   | GVPSRGLGYLLDLAPK |
| DTYSPFLFCTIRNFY  | LDQYGSIPKSFQA    | KPAALVHGMFVALPA  | FSIPQLGFTLSGATP  |
| TPEQRPLYRRDGSYI  | GGALYSIGGILYAVR  | AQQLVLSADNMREYL  | FGIARAASDPGLTQT  |
| AQFGGQRFGECECWA  | IVLATYEIVCSKYPDG | LAAYHPQFIYAGSL   | MNIGQILETHLWCA   |
| YQNFAVTNDGVIFFF  | TPEQRPLYRRDGSYI  | MASTFTIVAIGTYCP  | TIRNFYDADPLAKAA  |
| APGCWQPITRDLWPA  | SMYSYPAMTANVGD   | AFSRPGLPVEYLQVP  | SLLSPLALATNGAAI  |
| IGGILYAVRWPDPWP  | TRARISGMPVLFWLD  | CWQPITRDLWPAPYL  | FAAFLDETMTYSCAM  |
| PANHRYLGPVLWSPD  | ILTRFGFSIPQLGFT  | LYLAYSEAGFRSGYL  | AALAGMRREQLPHG   |
| EEGAYAFETLVRHDR  | LLRTERLKSQRVAGA  | IVLATYEIVCSKYPDG | FAHWPRAGQLPVSAI  |
| GEVLLTENVEAGDIW  | SLTGAAQRAGLELLP  | VFGHAVRIFYKDAFA  | VSFGQVTSGLTAGVW  |
| EQPTIYTLTDEAPL   | GSSAMILAAYHPQQF  | FTLPGERIHVVFRSD  | AFNTPALNIHQIPLG  |
| WDLCRIFTDGDYTYL  | SILGYVVRWVDQGVG  | LVRHDRAYSYIPIIL  | PGSIDAITLFPGGTL  |
| DQILPVYAEYQQRSE  | DSLLPLNIPLEIYA   | DSPAAQVAVRWAARD  | GHAGDMAGYAGTLQS  |
| TRARISGMPVLFWLD  | EMTAVQRSFNRTLLS  | ERFTGDEVTYRADIY  | EIAVEQAALQSAWQG  |
| GFGNFGAGSSGWWNQ  | RAQGACTITVHPLLG  | GGALYSIGGILYAVR  | VVVGTDGSDSSMRV   |
| ATLFDPREQPVCDGA  | PPFRLPLLFNALG    | VYGNTRLGLFPFRRG  | AQIAGADAKLIASA   |
| DTVIYSKYGGTEIKY  | PEFSELFAAFPSFAG  | WDGVAITLWTSQLYR  | GNSLKVGNADVCCGG  |
| YHPQQFIYAGLSALS  | NTPAFEWYYQSGLSI  | YHPQQFIYAGLSALS  | PAVSQFNARTADGIN  |
| MKAADIEAYPQWIS   | LSQDRFADFPALPLD  | YELNITSATYQSAIP  | TTVTFSDGRTPFTV   |
| SSAWQGDGTGITYQGW | DALRIVMADSRPLTN  | ESSAAFQAAHARFVA  | PLDPSAMVAQVGPQV  |
| VNLVDTLNSGQYTVF  | VFGHAVRIFYKDAFA  | ATVVTGKARTTVARD  | EAYQGVQKWDATAT   |
| KDFDGRSEFAYGSFV  | IGPYNLRYRVLADWD  | RVQRVVGSAAPASLG  | QANAHGQKVQAAGNN  |
| IVLATYEIVCSKYPDG | RSLARVYGAGTPCAL  | GIPYIAIANAYWSPY  | EARRGLERGLNALAD  |
| RYRVLADWDFNIRCF  | PLIFALYCLPLNWL   | EAGFRSGYLDVYQWT  | SLGIIVGIDDSAAQ   |
| RPTQPGSYPIVLATY  | NLCRIFTDGDHTLYA  | EAPYELNITSATYQS  | AGRLTEPHIVPIHDY  |
| AYSEAGFRSGYLDVY  | IVLATYEIVCSKYPD  | PYIAIANAYWSPQAR  | GPLAADSRGGNWP    |
| DDLGVNVNGLSDLY   | SGNFSNGILWRGNFE  | WQGDGTGITYQGWQTQ | SPAVPNALQASLGA   |

|                  |                   |                  |                  |
|------------------|-------------------|------------------|------------------|
| NYEGLAGFSFGYPIP  | SVTLSVEQRLARQR    | TADGINYRVLWQAAG  | LGWTSEQIVERFGFS  |
| IVLATYEIVCSKYPD  | PQLVVPVLNARFALN   | ENAMEQFVYAYVRSC  | YVAQKRKISDGDKLA  |
| YPTVDYAFQYDGVND  | VKGAWVLARYDDGRP   | NFVRSSNLKFQDAYN  | GDFQHTTEEAIRMNC  |
| SIMAIVADIERYPEW  | PNIPLEYYAARFITP   | RSLARVYGAGTPCAL  | LVYSDGTATGAADPR  |
| FDPREQPVCDGAYWV  | TQAVVLKVYQNAGGT   | AFAMTVPPSLVAANR  | IGFGESYMAGEWSSK  |
| DEALYTEDRAWTEAV  | RRATIEQLLTIPLAK   | AHFTGAFGPVVVPPI  | EALPERERTVLVLRP  |
| NFPNGTHSWEYWGA   | RPGNYRYAINNSFGF   | DTNIIKLPNISASVP  | RLLAKSLARLRDQLE  |
| AAAIAAVEAEYELMW  | VDPRIYIHLIPANVNA  | MTPKVPYYSATLFDP  | RIFYKDAFAKHQELF  |
| RLAGIPYIAIANAYW  | ARLAGIPYIAIANAY   | QTFTSIAISMYCPSV  | AGGLASPYVVTGLNN  |
| QSAWQGDGTGITYQAW | LYLAYSEAGFRSGYL   | IVLATYEIVCSKYPD  | MLRDMGVEHVYDSRS  |
| EKIFGPTRDWECYCG  | SLPAALRACACLQPH   | IGGILYAVRWPDPWP  | GLSSLGWDLCRIFTD  |
| TWYSVGRIYNAGDLF  | SDTCIECPDGTVGEI   | FGNFGANMSGWWNQA  | FACDPRYNQLGLPLP  |
| DQEYDDFWDEDGEVM  | IYSKYGGTEIKYNGE   | AVHDTLFCVANMPA   | GGSLTTQQUALVAGVP |
| ESIRDFARASFSYGL  | GLFSYSYSLDVPRIT   | GFSSMLWGGGSLPTI  | VSNSLVAHMKPGAVL  |
| YAFLPIVRAFAEPAG  | APLDGVGALLRYAAT   | MSFVTIQPVVLAAT   | YNKVRGDKVIAYARK  |
| YDDFWDEDGEVMRDY  | KVLAAMYQGTIKTWD   | GYTATFLETSPQFFP  | PNGISIPNNPLALLA  |
| FLAEGGEIMITPEEG  | DPITIFPGGFTIDPL   | LATYAFPLIVRAFAE  | AGLAGVGNIGLNAG   |
| CDFYEEQMQDAFETG  | DVKRFRGFDNWEGBA   | EYAARFITPVHPGYT  | STGMSSGGFVTAPTQG |
| LFCTIRNFYDADPLA  | GTAVRAFMQAAIGPG   | SGNFSNGILWRGNFE  | IGPATIIPPIHIPSI  |
| SGNFSNGILWRGNYE  | ALAVAVSPPAAAAGDL  | TPIGDPIEYRSLARV  | PLLGHLSWELAIPM   |
| EIGKADVYGNTRLGL  | SLSVYARVNPFGFIE   | KVSHPIVFGHAVRIF  | QSSFYSDWYSPACGK  |
| VAVTPEQRPLYRRDG  | VGSPYAVEYVWGRQV   | PITRDLWPAPYLVMD  | ANRAVKPTGSAAGL   |
| FGFGGHNVAIAFGRY  | SAHIQRTVASCNTR    | VVAGEPRPGNYRYAI  | AAPSIPAANMPPGSV  |
| PITRDLWPAPYL VMD | LYSIGILYAVRWPD    | MMGNAFLTALTNAGI  | AAKVVPSVVMLETDL  |
| RITPKDVIDVRSVTT  | FGFGGHNVAIAFGRY   | GLFSYSYSLDVPRIT  | PSGGSRTVQVTLGKA  |
| GVPLYLLLGWVAVVWY | MASTFTIVAIGTYCP   | SITYNEWSFAVGKQL  | MNNLALWSRPVWDVE  |
| TGDEVTYRADIYALA  | FAAPVALAAYPITGK   | ARASSRYGHWPPAVA  | VPGWTKPIVIGRHAF  |
| LSRMPDLRCLILTSY  | YRVLWQAAGPDTISG   | EIGKADVYGNTRLGL  | SGSTAQENAMEQFVY  |
| FGNFGANMSGWWNQA  | AFEWYYQSGLSIVMP   | LTEGMRFDKGYISGY  | QPGSYPIVLATYEIV  |
| EVQIGKFRVLVFLTGP | ATIATFEMRYLQSLP   | IVISNVPRLVPGWTK  | GPGQEGLDQYGS IPL |
| YLDIRLDYYDLGIEH  | FDKGYISGYFVTDPE   | WQGDGTGITYQAWQAQ | PVAITIDSVGQTIAG  |
| DTNIIKLPNISASVP  | RPTQPGSYPIVLATY   | AMAAAATPYVWGLAA  | ALSAGVGAVAMSLTV  |
| VEQASVILRRITIDAD | VLMYSGAGSSPLLAA   | ITPEEGAYAFETLVR  | VRDQPARQLVQRSEE  |
| YLDVYQWTLIREGPP  | GAAQRAGLELLPFGG   | AVFNFPNGTHSWEY   | QATTILRRGD NATLL |
| SPYAQRFRPLPDIW   | LIVEPWMGPAAAAMA   | KVSDLKSSTAVIPGY  | KLAAGSKTQTVLPFT  |
| QAYRKPITYDTLWQA  | ITLFPAQNFNTTFPV   | SDALRQTARQLATWV  | IPSRGAWLEFDVDKR  |
| ILPYLDIRLDYYDLG  | AAEYGRLRHGQILFT   | FSVSGSQTYGVDVVG  | ADLDERGIVRIGAEV  |
| LDPSRYEVHFACDPRG | IAASYDAGVLTVRVA   | GRSGEPFPYPVTVGY  | PAHAAHHLVEGVARV  |
| VDYAFQYDGVNDFPK  | NARTADGINYRVLWQ   | LMASDFHAFSAAPNF  | VVASYNEFGGLSNTI  |
| DNRGSQFYLAMywaQ  | DEIHTSMEAGPMVRK   | RPTQPGSYPIVLATY  | RAGHAITRAIQLAGL  |
| SITYNEWSFAVGKQL  | SLLKSLEGTYRLAP    | PPGSALLVVKRGPNA  | MGGVPGVEPADVVVI  |
| RPKRPGSYPIVLATY  | IGGILYAVRWPDPWP   | GEAATLAHVVRPFVL  | IPAFGGGTAIPISVG  |
| WTSSGAIGPTWYSVG  | VAVTPEQRPLYRRDG   | AACKWEGGYVWACK   | GPPFFGLGVVNISGIE |
| VGATSEIEPFIVWTS  | MPDLRCLILTSYTS    | NSWVDVFAHWPRAGG  | VGSVNVGFGNVGDFN  |
| HTKHyrVvSKPAALV  | VVSQLVRS PGVYFDE  | AALVGALSVPHSWTT  | DHHGLVGFYSIEIT   |
| LSIVMPVGGQSSSFYS | AVERAGAGVLLRTER   | KEDEYPSTAYLQYTS  | GVLNVGSGISGLYNT  |
| GSQFYLAMywaQELA  | MGSVELPAKQVNSEL   | VYLLDGLRAQDDYNG  | NYEGLFSYSYSLDVP  |
| YQEINFCKTNGQFD   | GGLPAFTLFPGLLNI   | LGALQAGRIAVPLSV  | FGYPIPLFPAVGADV  |
| IGPYNLRYRVLADWD  | YDDFWDEDGEVMRDY   | GIRLVIVLRRRWPVK  | LPAATADAYATTEAV  |
| VFGGKYVSLTTPKNP  | DVSVLTAARFTAHTK   | GLELLPFGGRFVEIG  | AMMAHAGDMAGYAGT  |
| QSSFYSWYSPACGK   | AMEDLVRAYHAMSS    | PATVIRLSDYPYVVP  | FGNLLSFASLPTVGQ  |
| IAPMTPKVPYYSATL  | GKPTSTNPIASIFAW   | LPTDRPIIYATLGSS  | VQFQSGGNNSPAVYL  |
| FTDGDYTYLADVPEL  | TVGQVVVLGWKVS DLK | GVRLAFVCAVDMPY L | PSPPPQPTQYRQPYE  |
| KALCDFYEEQMQDAF  | YAINNSFGFGGHNVA   | QEITRGRCAAISVPG  | NAQLVGVNSAIATLG  |

|                  |                  |                  |                   |
|------------------|------------------|------------------|-------------------|
| AVLSSAWQDGTGITY  | RYRVLADWDFNIRCF  | AKFILDVDPRYIHLI  | TDDQVTIDAAYAIAIKK |
| GLAGFSFGYPIPLFP  | LDPSRYEVHFACDPRG | EFRVAITPAGVAELT  | KLESVVIATVESGKM   |
| SPELFACTIRNFYDAD | YHPQQFIYAGSLSAL  | ILYAVRWPDPWPTTF  | LVLADNMREYLAAG    |
| GRSGEPFPYPVTVGY  | MHVVVASYNEFGGLS  | DVSVLTAARFTAHTK  | GTVATTPASSPVTLA   |
| SITYNEWSFAQAHL   | TFTIVAIGTYCPAVI  | RLAGIPYIAIANAYW  | ASFLDQVHFQPLPPA   |
| LYSIGGILYAVRWPD  | LPIVRAFAEPAGIKI  | IFAVVRGTATNQDGR  | WNNPAIQALNRDFTL   |
| YPYVVPLIDLEMRRP  | GQQQTYSQQFDWRYP  | LTYHVIAGQASPSRI  | LDAILAGASGYVVKD   |
| FNKLLGPLPFPHPI   | SPNGTIRNILGGTIF  | ILTRFGFSIPQLGFT  | LIALPPDLASGVVQP   |
| GRNHYLAAVYRTDLA  | SNVQLNPFVNLKLQ   | GTAFLRVLNRDRNYT  | YNYMAPERFTGDEVT   |
| PLIFALYCLPLNWL   | GRNHYLAAVYRTDLA  | GLVIGICAPILGGYP  | VTDFNNRVVTLAAGS   |
| YYSATLFDPREQPVC  | GINYRVLWQAAGPDT  | RRPTYVFAAVDHTGA  | YEDAIIILSNRLVEED  |
| YRVLWQAAGPDTISG  | PTWWHSLPTDRPIY   | EFEGELPRLFVVTRQ  | ERLRWLVAEAGPFAS   |
| VLADWDFNIRCFNSP  | EFEGELPRLFVVTRQ  | VQAAMEDGYRVFADV  | AGFGHRVEIDLCDYR   |
| RIPLDVAEGDTVIYS  | GNRIFAVVRGTATNQ  | LPVEDMPFLADGTPV  | QGEPVDIGGYYAPDS   |
| MWELYLAYSEAGFRS  | LSKTVEVTADAASIM  | VFVMAAPGQPLPTLP  | TAVMRPSKTFNAALE   |
| MGQGNDLVLDTSSFY  | AGVNELVRVYVAQKR  | ATIATFEMRYLQSLP  | CVEQYRQDQFARLDA   |
| GGALYSIGGILYAVR  | PAVAKVPRGPLAAAS  | EGGYVWACKNYDGDV  | KVQPAVFVAVQVALAA  |
| LHAWSVDVSEWPGI   | AVFNFPNGTHSWEY   | FRSGYLDVYQWTLIR  | GAGVLLRTERLNTEG   |
| IPPPNSALVSWLPFY  | RPKRPGSYPIVLATY  | THSWEYWGACLNAMK  | NLCRIFTDGDHTLYA   |
| FIVWTSSGAIGPTWY  | QGIEGTIHAVYYPG   | WTSSGAIGPTWYSVG  | AFNSGSFNNGALWTG   |
| GVLWRGDYEWGLS    | STAYLQYTSWSTRTP  | RKYAADRKILNEIA   | LNLDFVFGTGPATIP   |
| DISVAARILAEFPDY  | VAAIKEFFGTSQLSQ  | DTLFCYVANMPASVP  | LIEDLARRAVQTDAAE  |
| WQDGTGITYQGWQTQ  | LSIVMPVGGQSSFYS  | FPMTEKGTFIINGT   | FRLVFLTGPKQGEDD   |
| QTYSSQQFDWRYPSP  | DQEYDDFWDEDGEVM  | AQLVVVGSRRGGYA   | MRIKIFMLVTAVVLL   |
| WRGNYEGLAGFSFGY  | LATYAFLPVRAFAE   | NGMSRDMASTFTIVA  | GVATAAPKTYCEELK   |
| LVALHAWSDVDVSEW  | HHDMVPLAQIYNNRA  | LDPGQPVSRVIRGE   | LGSSSDLRVGQPVLA   |
| AEAEYEQIWAQDVAA  | LRCLILTSYTSDEAM  | IYSKYGGTEIKYNGE  | FRRSFRLPAHVTESEA  |
| FTLPGERIHVVFRSD  | GSYIVKPKMHGPAE   | AYAFETLVRHDRAYS  | TYRLAPKGSQTEVTY   |
| AAEYGRLRHGQILFT  | LIGSLSVYARVNPFG  | MVKVFLVDDHEVVRR  | LNLDGPTLAKIFNGS   |
| NTPAFEWYYSQGLSI  | LRAIFGEKAREVRDT  | GPVWVFSGQGSQWAA  | ALVSAPAGGRAAHAD   |
| NNQVVLPFTDITAPW  | DHTLYADVPELMPTY  | GNDLVLDTSSFYRPT  | AEAEYEQIWAQDVAA   |
| HPIVFGHAVRIFYKD  | FLENFVRSSNLKFQD  | RDQARRNIAVHYDLS  | YHSAASAVATQLAPI   |
| LAAYHPQQFIYAGSL  | TQTWIQKYIFPGGLL  | TPEQRPLYRRDGSYI  | PQLGFTLGSATPADA   |
| WDADDYYDPEPGVPG  | AYNINISLPSYYPDQ  | GSRFLLDQAITSAGR  | ARRNIAVHYDLSNDL   |
| GINYRVLWQAAGPDT  | GVSGFGNFGAGSSGW  | QTYSSQQFDWRYPSP  | VLPACLDIARQTCG    |
| APAIAAAEAEYEQIW  | PQPSQLRPGRVPPAL  | VSTANATVYMIDSVL  | PTMTGTVPNVGLMAQ   |
| AALQSAWQDGTGITY  | PPEVNSARIFAGAGL  | VAVTPEQRPLYRRDG  | ELAAQTDQQLAEHF    |
| DHHGLVGFYSIEIT   | MSAEQPTIITYTLTDE | LLAKSGKTIVLKPEV  | ADVLTKNEDVIVREL   |
| SGFGNFGAGSSGWWN  | GVIFFNPGGELLPEA  | ADAYPTVDYAFQYDG  | IPPPNSALVSWLPFY   |
| QDDYNGWDINTPAFE  | LKWEGGYVWACKNYD  | YAHEYQRSEKVLTEY  | WPRAQGLPVSAIAWG   |
| FAVTNDGVIFFFNPG  | VSYGSVVSTLIVEPW  | QAGLEKLGSQLRGRD  | NLLQVVLNALADLPV   |
| NADGELYVIAGDIPL  | YAQQQQQTYSSQQFDW | ITYQGWQTQWNQALE  | RLVKLLYRLERPLLF   |
| GGTDSLPLPNIPLL   | PPEINSVLMYSGAGS  | MPDLRCLILTSYTSD  | GNFGVFNSGSYNTGV   |
| ILGGYPAVLTSVPVFS | RSIGVYAVNYPASDD  | NAFLTALTNAGIAYD  | RIPLNLGASVTVGPI   |
| EMECWAMQAYGAAAYT | ERDRLVSERLLTLGW  | VWYTATILHNAGVTA  | GVANPGSYNTGSFNV   |
| KEDEYPSTAYLQYTS  | HYLAAVYRTDLADRV  | HTKHRYRVVSKPAALV | FFNTGTGNWGLFNNG   |
| HYLAAVYRTDLADRV  | SAAIDSDRWPAVAKV  | LEMRRPTYVFAAVDH  | IDAITLFPGGTLFPA   |
| RACACLQPHDPAFTF  | TADGINYRVLWQAAG  | RRALRQIGVLERPVG  | TGPIHIGLPLSLTIP   |
| FETLVRHDRAYSYI   | TDEAPLATYAFLPI   | DTADRLVSAATATGL  | LTNAGIAYDQPATTV   |
| HKRRLSALGPGGLSR  | KVSHPIVFGHAVRIF  | VVLPWDGRNHYLAAV  | NEFNVDVGSLSNGTY   |
| TAQENAMEQFVYAYV  | AQIADLDQEYDDFDW  | DTGITYQGWQTQWNQ  | LKVGNAVVCGGVST    |
| LDPSRYEVHFACDPR  | TGDEVTYRADIYALA  | NEGVKGAWVLARYDD  | MLKGFAPAAAAQAVQ   |
| VVSDEIVYLTADEED  | WTGDHHLVGFYSYSI  | TVGQVVLGWKVSDLK  | KTTQTIYIDADPGEV   |
| MPDLRCLILTSYTSD  | CWQPITRDLWPAPYL  | WHRRRVIEPIDMDAY  | IADIEAYPQWISEYK   |

|                  |                  |                  |                  |
|------------------|------------------|------------------|------------------|
| VKVIPSRGAWLEFDV  | SEFAYGSFVRTVSLP  | AEATVYVATSKPGQP  | RKAMLQDMAILTGGQ  |
| MASTFTIVAIGTYCP  | APAPPPFRLPLLNVN  | MSEVAGRLAAQVGAY  | PEVATWLEVLPPGV   |
| QFNASPAVQSYLRNF  | NGDEVQIGKFRLVFL  | NTRLWVYCGNGTPNE  | FTGLNSLTYDVSVAQ  |
| IGKFRLVFLTGPKQG  | AANDVSVLTAARFTA  | IMAHVSYVQSGMTSQ  | PTATLLDTSPELFC   |
| TAVAAICHYIAMWVW  | SDALRQTARQLATWV  | GSGQTYGVDVVGYDR  | AMAAPMFSHIPTLN   |
| GIRLVIVLVRWPVKV  | NADGELYVIAGDIPL  | RSCPGYTLTDYNANGS | DISVAARILAEFPDY  |
| LTTYILLPSQDLPLL  | FRGRWLDPRHAGPAT  | GNRIFAVVRGTATNQ  | VNNGLSDLYSKIESL  |
| KVSHPIVFGHAVRIF  | TIRNFYDADPLAKAA  | FIVWTSSGAIGPTWY  | TGAGGSAPKHVKQLV  |
| TADGINYRVLWQAAG  | HAFGDQYRATNFKVD  | AVLSSAWQGDGTGITY | WVHGDNVGNGYWQKP  |
| QRPLYRRDGSYIITG  | RALAMSNLLGQNAAA  | EQQRLARQRVAAAAGF | ERTFGGKIVTPSPGT  |
| LPSQDLPLLPLRAI   | DIKATYDKGILTVSV  | DRMFLAEKTVKNYVS  | PAEASAPESSPGDAE  |
| EFEGELPRLFVVTRQ  | QSAWQGDGTGITYQAW | YAQQQQQTYSSQFDW  | SFAERGVTLGAAFGG  |
| APKDLEKIIYFAAYV  | NNQVVLPFTDITAPW  | IGKFRLVFLTGPKQG  | PLSSGSFGDATGFTV  |
| PYIAIANAYWSPQAR  | NYEGLAGFSFGYPIP  | TIFPGGFTIDPLPLS  | IQVAIPLTSATLGGL  |
| ITYQGWQTQWNQALE  | NGSITQWNNPAIQAL  | IEPFIVWTSSGAIGP  | PLDTPPAPAPPPFRL  |
| VVLPFTDITAPWGIA  | SSILTYHVIAGQASP  | TTVALGRSVCMPVVA  | IPVLAEAAGTVSKVA  |
| GLVIGICAPILGGYP  | EADLDVLEHGTVLL   | DLYSKIESLPASQRD  | AMLARDGAEAAKWGG  |
| VDGVVSDEIVYLTAD  | SIMAIVADIERYPEW  | TQDVAVLQLRGAGGL  | GVIKVVREIVSGLGL  |
| DPRFNKLLGPLPFPH  | QRPLYRRDGSYIITG  | MLSVVPLMAGGGMYE  | ELTMTDTVGVVVLGW  |
| EQVLAERLAGWQERY  | REPIVISNPRLVPG   | INAFSVGSGQTYGVD  | AGQIRSGGGSPTVHI  |
| NCQSILGYVVRWVDQ  | NTGALITGNFNSGIL  | FNKLLGPLPFPHPHI  | TEQKDFDGRSEFAYG  |
| GEMWAQDAAMFGYA   | WRGNYEGLFSYSYSL  | ESIRDFARASFSYGL  | GLLGIASLTPVQVGS  |
| IDMDAYRQFLTEIGY  | EGLPPGSALLVVKRG  | QAQWNQAMEDLVRAY  | AGVGAVAMSLTVGAG  |
| MTYAAPLFTVAEFIN  | EGTYIHAVVYPGENQ  | TDEAPLLATYAFLPI  | DPLSGLTDQERTLLG  |
| VPLRAIPLLNPLAD   | SAPQGLEVVVAFLGA  | PPIVFLPSMTIGGQT  | EGLTNKQIADRMFLA  |
| DVETGLFVPAVTPW   | RHGLSSLGWNLCRIF  | ALVYLQFRGEFTPKT  | QAAVFATELKRSRPP  |
| QQEDEALYTEDRAWT  | TVGLIKAILSLRHGV  | MSAEQPTIHYTLTDE  | TIDKSTDKTLHSVKV  |
| AFAMTVPPSLVAANR  | LPSQDLPLLPLRAI   | ARSLDPSRYEVHFAC  | LVAVSWAVGSAKAGL  |
| VVSQLVRSRPGVYFDE | GVPLYLLLGWVAVVWY | TWWDLSLPTDRPIVYA | LIATGEQVLVNEHLI  |
| NGGEYTVFAPTNAAF  | LTYHVIAGQASPSRI  | SGNFSNGILWRGNYE  | PAVAKVPRGPLAAAS  |
| NFVRRSNLKFQDAYN  | RVVVRTGRASARGLI  | DNRLSLSVSARLAGI  | TQTWIKYIYFPGLL   |
| SGVGNLVLDTDSFY   | RGGPGGAPGCWQPIT  | DTYSPELFTIRNFY   | WSPQARRRFLPDVP   |
| SDPAYNINISLPSYY  | QLNPFVNLKQLFLH   | LTSILTYHVAVAGQTS | NVGDVNLGAGNLGNL  |
| AVDALTEYGLLRGSW  | VSPLTVQKYM PNGAA | SSLLKSLEGTYRLAP  | FGANMSGWVWQAHTA  |
| KPAALVHGMFVALPA  | HIPQLVASQSFAAAK  | VDYAFQYDGVNDFPK  | AGSGIANVGTLLHSGV |
| LYLAYSEAGFRSGYL  | NFVRRSNLKFQDAYN  | EYPSTAYLQYTSGST  | GILWRGNYEGLAGFS  |
| FSAASAFQSVVWGLT  | TIPLNIHQTFSLGPL  | AAQVRVAAAAYETAY  | GSLQGWVWGAAGTAA  |
| GFSYSIEITGSTLVD  | EYKEVEILEADDEGY  | SIARAKGAEIFATAG  | NITSATYQSAIPPRG  |
| LFVGGALYSIGGILY  | GMLAIGAVTIAVVSVA | IAPMTPKVPYYSATL  | PPQPTQYRQPYEALG  |
| HAVRIFYKDAFAKHQ  | QVGDRVGGFSEGGCW  | QDLPLLPLRAIPLL   | QSGSIGLGAIPVDQ   |
| NPIASIFAWTRGLQH  | QEQRAGGACTITVHP  | SLSVSARLAGIPYIA  | GGTPRAVPGRVVALG  |
| SILGYVVRWVDQGVG  | MNLRRHQTLTLRLLA  | FGVRLVKLLYRLERP  | SVVIATVESGKMTKD  |
| LQTTDGSITYNEWSF  | HTKHRYRVVSKPAALV | LADIAPMTPKVPYYS  | LSKTVEVTADAASIM  |
| SAAIAATQAAYAEMW  | VVLPFTDITAPWGIA  | RPSFSSFAVGPDPGMP | VVVIREQPPPGNPPR  |
| DDPFVVEFDLPVRIG  | IVSTPVFDGAQEAEI  | VGTYNYMAPERFTGD  | SNTFGLQLELLEGMR  |
| FLFTQYLSKQDPEGW  | PYAVEYVWGRQVGDN  | TEVQGEVDIGGYA    | EGDEATGANIVKVAL  |
| WSRPVWDVEPWDRWL  | ILYAVRWPDPWPTTF  | QLLASEPVFAATIAK  | LDQVHFQPLPAAVVK  |
| YPEGLAVDTQGAIVVY | TDDIDHFGNRRRLRTV | RLRRLLEQASVILR   | LRCLILTSYTSDEAM  |
| RAQGACTITVHPLLG  | GVLDPITIFPGGFTI  | EPGVPGRSVSRWGGF  | ARAWRSLDVEMTAVQ  |
| IRDWVKLAVTRARIS  | QTYSSQFDWRYPSP   | HAVRIFYKDAFAKHQ  | LSEVERQIHEIVRAY  |
| EGVTGHQVGDVGGF   | AALQSAWQGDGTGITY | NGDEVQIGKFRLVFL  | DSVERLIAAHLMDPA  |
| AGCQTYKWETFLTSE  | VVASYNFEGGLSNTI  | PSDVIVDASMPAMIR  | VRSVTTEINTLFQTL  |
| IKIEASDISVAARIL  | LPDVIWTRLFVRLV   | YDPEPGVPGRSVSRW  | GGAPNPYTYPENLPR  |
| TPGSITYNEWSFAQA  | SPAVYLLDGLRAQDD  | MFRELVGLPAGSPEF  | RGGPGGAPGCWQPIT  |

|                  |                  |                  |                 |
|------------------|------------------|------------------|-----------------|
| STAYLQYTSGSTRTP  | MTELVTKAFPPYVVV  | AANDVSVLTAARFTA  | EFFHACTAVAAICHY |
| GTGLGSAEELVFSYD  | LRISLSVSARLAGIP  | AAAAAYETAYGLTVPP | LGEATVVTGKARTTV |
| QGEPVDIGGGYAPDS  | RLAGIPYIAIANAYW  | VEQASVILRRITIDAD | VATGEVLLTENVEAG |
| QLVASQSAAFAAKAGL | YQGTIKTWDDPQIAA  | GVETRIEAVPIAGFA  | PVDIGGGYAPDSMT  |
| GYTATFLETSPQFFP  | TSTNPIASIFAWTRG  | ALYPAGRLVDAPLPA  | MRPSKTFNAALEAVQ |
| IAAVEAEYELMWAAD  | QSGLSIVMPVGGQSS  | IGPFRIEPIDVPAVV  | EQDWDGVAITLTWSQ |
| ILDVDPRIYIHLIPAN | FGNFGANMSGWWNQA  | HDYGEINGQFFVEMR  | HAFSAAPNFAFELAA |
| EVDLLDLDAPNGYTF  | TTSTVLPFTGLNTP   | GVYAVNYPASDDYRA  | RAGAALDYSALYPAG |
| HDYGEINGQFFVEMR  | PSQFFPFTGLNSLTY  | VSPLTVQKYPNGAA   | DAPLPAWTHARLFID |
| GLNVGITIPEFPIHW  | HGVVPPLLHFNRLPD  | MRSERLRWLVAEGRP  | RRSVAVTPEQRPLYR |
| VRVAAAAYETAYGLT  | PAEFLENFVRSSNLK  | SRYEVHFACDPRYNQ  | ELLSLPQDEWAGRLR |
| DAPIRDWVKLAVTRA  | KRLPMSTRLGIRLVI  | VRVAAAAYETAYGLT  | DPRFNKLLGPLPFP  |
| IVDVATGEVLLTENV  | LSLSVSARLAGIPYI  | AAPEPVARRQRILFV  | PTYDLPANHEYLGPV |
| EWPEDRQSLSWTLES  | SGQTVLPFTGIDFRL  | PVLPPEINSVLMYSG  | VGADQVWADADLLL  |
| SLSVYARVNPFGFIE  | VAIVAAAGYLVLRPS  | AGDKKIGVIKVVREI  | EPIAAEYGRLRHGQI |
| ASVILRRITIDARDF  | FVLARSLDPSRYEVH  | AEGDTVIYSKYGGTE  | GVGCKVDPDIHVAL  |
| LPVTVIAATAGRNHL  | EGGYVWACKNYDGDV  | YAINNSFGFGHNVA   | TIPAIPIGLELNGGV |
| ACLQPHDPAFTFMDY  | NIGLIGLSVYARVN   | VGGQSSFYSDWYSPA  | GPIIIPDTTILPPIH |
| YDHPTFAVHDTLFCY  | GLVIGICAPILGGYP  | EQSTGKIYFDVTGPS  | PIIIVPPTPGFGNAT |
| TDEAPPLATYAFPLI  | TNDGVIFFFNPGELL  | AVVRVQGVSGLTPIS  | DVFGVTPGATIPAIT |
| HQAIVRDVLAAAGDFW | GFPALPGLPSIPNLF  | AAANSWVDVFAHWPR  | IPANADGELYVIAGD |
| ILRRITIDARDFIEY  | RTDLLSTLPQRVAVR  | PDALRDGNRIFAVVR  | PFDLPTVVIDRIPVE |
| QLVEENHLRWDSLGE  | ESIRDFARASFSYGL  | AAAVQAAMEDGYRVF  | SYAMTANVGMAGY   |
| DGVGALLRYAATNRL  | FTFMDYEQDWDGVAI  | GAAQRAGLELLPFGG  | TQSLGADIASERTAP |
| APWGIAVDEAGTVYV  | QLPDTNIIKLPNISA  | RITPKDVIDVRSVTT  | AGRLLGSVPANVSRR |
| WHRRRVIEPIDMDAY  | GSWLTMIRLAKCGPW  | TQQALAAGVPVIGLP  | RRLMIGTAAAVVLP  |
| EFERVYEEEFKAQFE  | SLSVSARLAGIPYIA  | TRARISGMPVLFWLD  | PAEFLENFVRSSNLK |
| LYLLLGWVAVWYTAT  | GLAGFSFGYPIPLFP  | AAPGLAARRRRILFV  | ACQIQMSDPAYNINI |
| DNRLSLSVSARLAGI  | ITYQGWQTQWNQALE  | DLKSSTAVIPGYPVA  | GTEIKYNGEELYLIS |
| EQQLRARQRVAAAGF  | FLRVLNRDRNYTAPG  | AGSYTPFALLALPAH  | LTNNHVIAGATDINA |
| ESSAAFQAAHARFVA  | QVGSQFGPYQLLRLL  | VLVRRKAGEVEYVPS  | FKAQFEAAGLTYEHR |
| AVRWPDPWPTTFGYH  | VSGLLNQASSPMVGT  | VLMVVGCLGSGRWPG  | NYDGDVQSDTVAQGY |
| AGIPYIAIANAYWSP  | TAQENAMEQFVYAYV  | PAGRLVDAPLPAWTH  | AAATPYVGWLAATAA |
| FAHWPRAGLPSVAI   | AVLTAAPLLAAAGC   | FVLARSLDPSRYEVH  | VAAGANPLGLKRGIE |
| AAPGLAARRRRILFV  | IVAIGTYCPAVIAPL  | MGTQLLASEPVFAAT  | RAGPPTVHSEIVPAA |
| VKPENILVTASDFAY  | GQPVLAIGSPLGLEG  | VPIHDYGEINGQFFV  | QEMLNVMEEHQVRRV |
| GNRIFAVVRGTATNQ  | GIPYIAIANAYWSPY  | SSVPIIIVPPTPGFG  | PEHAIVQFVKAICSP |
| GVRLAFVCAVDMPYL  | PSSGFSSMLWGGGSL  | IRDWVKLAVTRARIS  | AFQYDGVNDFPKYPL |
| GNNSPAUYLLDGLRA  | VGGQSSFYSDWYSPA  | WVAVWYTATILHNAG  | TVLPFTGIDFRLSPS |
| LDEEIIWDLTSAEFT  | LFCTIRNFYDADPLA  | NTARPWHIGLYGNAG  | VKLATGSTGTTVLPF |
| VDSAGNVYVTSEGM   | VYVADRGNRRVVKLA  | AGVNELVRVYVAQKR  | SVPGAPNRVSFAKLR |
| LEEFDHQLTRIELRR  | LYRPLIFALYCLPLN  | DDGQEQRAQGACTIT  | EVPGLLDVQTDSEFW |
| YDALYGTDVIPETDG  | DTGITYQAWQAQWNQ  | RLLVEQASVILRRTI  | QFEAEIGRGSGLAAQ |
| ENILVTASDFAYLVD  | IGISLLSPLALATNG  | ASNSTGMSGGFVTAP  | VPDNLAEGLRQLP   |
| AAAAAYETAYGLTVPP | VYLLDGLRAQDDYNG  | YVAVMSVTAGQAELT  | GKCLKDKAVNPESTF |
| EVPGLLDVQTDSEFW  | AMAVVGGALLYLTIM  | GQPVLAIGSPLGLEG  | IGICAPILGGYPAVL |
| FKDEFERVYEEEFKA  | DNRGSQFYLAAMYWAQ | RFVEPRVLVRRKAGE  | DAAVGHGDRGPVWVF |
| ITYDTLWQADTDPLP  | TLLAVLTAAPLLLAA  | VNAIRGSVTPAVSQF  | AQGLPVSIAIWGAWG |
| VLFWLDPYRPHENEL  | RLVSRLLTLGWQQR   | GSVEQVAAKVPSVV   | DRPIIYATLGSSGGK |
| DRVGGFSEGGCWRTF  | TRVIWKLIKMLILP   | GQAEELTAAQVRVAAA | RFPLPDVIWTRLFGV |
| GKNLLVAIMPWEGHN  | RWLRDFFGPAATTDW  | SDIAVVRVQGVSGLT  | ATTGSLALTLPTVTI |
| RAGAALDYSALYPAG  | PIFGFGGAPGFGNDT  | LRIVDAASLRPHYAE  | TTSPIPLKIDVSGGL |
| QSGSIGLGAIPVDQ   | LMASDFHAFSAAPNF  | FGTAFAMTVPPSLVA  | LNHIQIPLGFQVPGS |
| RKYIAADRKILNEIA  | GFGNFGAGSSGWWNQ  | GSVVSTLIVEPVMGP  | ITLFPGLTFFPANSL |

|                   |                  |                   |                   |
|-------------------|------------------|-------------------|-------------------|
| LTYHVIAGQASPSRI   | MNNLALWSRPVWDVE  | QVESTAGSLQGQWRG   | IHIGLPLSLTIPGFT   |
| PFTDITAPWGIAVDE   | SSLTSILTYHVVAG   | VADLVLVAPGSIPIT   | APIQADMMGNAFLTA   |
| YRPMAPNFDDSI AFL  | RLVKLLYRLERPLLF  | APAPPPFRLPLL FVN  | GILGQRCAPV FVMAA  |
| GYPAVLTS PVSFLQR  | GILWRGNYEGLFSYS  | PSMTIGGQTYTIPLD   | MINVQAKPAAAASLA   |
| GLAVDTQGAVYVADR   | AISMYCPSVMADV AS | CERLVRGLDTIAATG   | SSTAVIPGYPVAGQV   |
| GVIFFNPGELLPEA    | DNRLSLSVSARLAGI  | RRFPLPDVPWTRFFG   | TATVNAIRGSVTPAV   |
| TAVQGIEGTYIHAVY   | PTTYDHPTFAVHDTL  | WRGNYEGLFSYSYSL   | TFKSVAVKAPGFGDR   |
| FFNSGAGGVSGFGNF   | KIFNGTITVWDPQI   | WEATATVNAIRGSVT   | GTAVKAFLQSTIGAG   |
| RKVVDGVVSD EIVYL  | HRYLGPVLWSPDVKP  | RQRLATSLRNAAKAY   | AELRKIPLTLVHAVS   |
| IADIEAYPQWISEYK   | LMSVTQPDRVRELLA  | IIKLPNISASVPQLV   | AGELARDSIYYVDAN   |
| PTFAVHDTLFCVAN    | VYGNTRLGLFPFRRG  | DAKLIASAYLPQHE    | RAASPYVGLWNTAAG   |
| FPEIPANADGELYVI   | IYATLGSSGGKNLL   | GLTVGSWIGSSAGLM   | LNSLTYDVSV AQGVT  |
| PPPRLPLL FVNALG   | ALEDLVRAYQSMSGT  | FARMWELYLAYSEAG   | TAIMAQLAAGNEVVV   |
| RLLVEQASVILRRTI   | INISIIDIPALPGFG  | LRISLSVSARLAGIP   | PFTGLNTPLA VAVDS  |
| KRAMLRDMGVEHVYD   | IMAHVSYVQSGM TSQ | DAFETGVMFSLHVKA   | DSALLAAAGFGNTTA   |
| RRFPLPDVPWTRFFG   | SRQSCGRVVRVTGRA  | TAAQA AVVRFQE AAN | VHKPVTAGWNGY GDF  |
| AEGD TVIYSKYGGTE  | HLIGPPPATVIRLSD  | ATMPYVLELADHGWR   | IKTGNERAKLLGKTL   |
| ERDRLV SERLLTLGW  | SSAWQGD TGITYQGW | WTGDHHLVGFYSI     | LTHEDYLVLT TTAGG  |
| FFNTGTGNWGLFNSG   | FEATLAATVSPAMVA  | SSILTYHVIAGQASP   | VRDLIARWEQRDVMA   |
| GGEVSILQPFTVAPI   | FAVTNDGVIFFNPG   | AAEYGRLRHGQILFT   | AHATGTQVGD LAEGR  |
| AGELARDSIYYVDAN   | IIKLPNISASVPQLV  | MGSVELPAKQVNSEL   | VLWSPDVKPPTW WHS  |
| ESLPASQRDEIIEDL   | AINNALGGNRPAVYA  | AAQVA VRWAARDAEL  | VFINTGFLDRTGDEI   |
| GTIRNILGGTIFREP   | ALVYLQFRGEFTPKT  | HRYLGPVLWSPDVKP   | TIPGFTIPAAPLPLT   |
| YNLR YRVLADWDFNI  | DMLILPYLDIRLDYY  | YQEIINFCKTNGQFD   | NYNLGLGNV GDFNLG  |
| VNEAEY GEMWAQDAA  | AQLVVVGSRGRGGYA  | AAGTAAQA AVVRFQE  | VPSVTIPALTAARAV   |
| TEVQGE PVDIGGYA   | YPYVVPLIDLEMRRP  | TQAVVLKVYQNAGGT   | SGAIGPTWYSVGR IY  |
| AATIAKLEPVIAAES   | FTGLNSLTYDV SVAQ | SLAPYNHMEVGS PYA  | TFLTSEL PQWLSANR  |
| AHVVRPFLARSLDP    | VVSDEIVYLT ADEED | YRPVAGDFTPA AEIV  | STIDELKTNSSLLTS   |
| GTAFLRVLNRDRNYT   | IRDWVKLAVTRARIS  | PGYPVAGQVWEATAT   | YHVVAGQTSPANVVG   |
| IPAFGGGTAIPI SVG  | LAERLAGWQERYPNV  | WRSLDVEMTAVQRSF   | PVALAAYPITGK LGS  |
| IPANADGELYVIAGD   | AAPRSVG VPLYLLLG | TRLFGVRLVKLLYRL   | GGAAANAGVPKGVVV   |
| GKYVSLTTPKNPTKR   | AVLSSAWQGD TGITY | WSTPAVTIFPNGISI   | WSRPVWDV EPWDRWL  |
| TGHQVGDRVGGFSEG   | AQRRFPLDVIWTRL   | MWELYLAYSEAGFRS   | GIAS TLNPQV GSAQP |
| WISEYKEVEILEADD   | LPNISASVPQLVA AI | FDPREQPVCDGAYWV   | LDQYGSIP LPKSFQA  |
| GAAQRAGLELLPFGG   | ALVSAPAGGRAAHAD  | LLSFASLPTVGQVTA   | LVLDTDSFYR PKRPG  |
| VVPLIDLEMRRPTYV   | VNLVDTLNSGQYTVF  | HLIGPPPATVIRLSD   | TSQAATFAANRLDHA   |
| TRYMHVVVASYNEFG   | APTNAAFSKLPASTI  | SGNFSNGVLWRGDYE   | PNIPLE YAARFITP   |
| QQLSGSEEDETA WR   | YELNITSATYQSAIP  | VSYGSVVSTLIVEPW   | WIQKYIFPGLLPST    |
| SVGRIYNAGDLFVGG   | RLLVEQASVILRRTI  | GVIFFNPGELLPEA    | LAGSSYHTLSIDSGG   |
| LRGLLTELHRAGAAL   | LDPSRYEVHFACDPR  | AALQSAWQGD TGITY  | KTIVLKPEVPLDDGD   |
| VKGAWVLARYDDGRP   | VHKPVTAGWNGY GDF | IYFDVTGPSPTIVAM   | PHENELIKKVKTYLK   |
| VANIVDVATGEVLLT   | VERQIHEIVRAYEWA  | DNWIVGASNSTGMSG   | TVYVATSKPGQP PET  |
| FLDEMTYSCAMFTD    | SYLRNFLAAPPQRA   | AAAAA AAAAA PYAGW | EIAPDVVVGDNRLSL   |
| ELFDDLGVNVNNGLS   | VFLPSMTIGGQTYTI  | ACGGRIVLTARSQPN   | LFVAEAVTLAHVVRP   |
| AVIPGYPVAGQVWEA   | DALARRIGRHGLIGF  | DESYKVTGTAPIYEI   | NQSLIINLGLADVGS   |
| GVSGFGNFGAGSSGW   | IAITYNIKGVSTLNL  | NATVYMIDSVLMPPA   | TGQANYGFAVPDIPI   |
| SASIGTLGFTIPGFT   | KTFEIPEDGVANIVD  | RVVVRDQPARQLVQR   | LLSALGITGQFRFGP   |
| LDGLRAQDDYNGWDI   | TGSIALAITN TARPW | GMPVLFWLDPYRPHE   | DAYATTEAVNVVATG   |
| YEEQMQDAFETGV M F | DTYSPELFACTIRNFY | FDSMTQTQIAERVGI   | GDMAGYAGTLQSLGA   |
| LQGDV KRFRGFDNWE  | DRFADFPALPLDPSA  | NPIASIFAWTRGLQH   | LERPVG DSSDCGTIR  |
| ELHRAGAALDYSALY   | AIPLTSATLGGLALP  | VSARLAGIPYIAIAN   | LCKTTSNFIWGQLL    |
| QEQRAGACTITVHP    | PYNHMEVGS PYAVEY | RNTVQFAAAVQAAME   | QLVAAGGGPSQLASM   |
| EASDISVAARILAEF   | FTGLIAIHGLKASDV  | VGLGNVNGVT LGYTS  | KVYQNAGGTHPTTTY   |
| FRHHAHTIPSERFF    | INLSRNESASFEDLA  | IAITYNIKGVSTLNL   | IPGVIPTMTPPPGMV   |



|                  |                  |                  |                  |
|------------------|------------------|------------------|------------------|
| GPVLWSPAGKPPTWW  | MTDVTGQVVLGWKVS  | LGPVLWSPDVKPPTW  | SIGLGAIPVDQAKR   |
| YILLVSSKVSTVKDL  | LQERVIRPSYGLAEA  | RTDLLSTLPQRVAVR  | GTVTRHYRQYQAGKP  |
| RRSVAVTPEQRPLYR  | NTGAFISGNFNGVL   | AWVLARYDDGRPSQV  | ERYPEWNEGKGAWW   |
| PGGSFNTAVASVVAR  | VLNRDRNYTAPGGGQ  | LSIVMPVGGQSSFYS  | EMWAQDAAVMYSYEG  |
| LPNISASVPQLVAAI  | EIPPDRWDADDYYDP  | GFGPIAVPSVTIPAL  | LFNLWGPAFHERYPN  |
| NEDVIVRELTEVQGE  | LSELGEPVDRVARAD  | FSTPPITIDRIPLNL  | QALNRDFTLPERIH   |
| SLPAALRACACLQPH  | EAHGTGTPIGDPIEY  | PLPVVFPVQGELSK   | SAHIQRTVASCNTR   |
| PFGFIETPYRKVVVDG | RACACLQPHDPAFTF  | FASLPTVGQVTATMG  | PLLGNPLADLIQPD   |
| ALYPAGRLVDAPLPA  | DAKLIASAYLPQHE   | IVAIGTYCPAVIAPL  | DKDMTYAAPLFTVTA  |
| DIVIPAFGGGTAIPI  | LRAAEDDCPPPGYDI  | AVNGTAMRESFAERG  | GLTHKRRLSALGPGG  |
| VYVADRGNRRVVKLA  | ASAPESSPGDAEVP   | VVAPGGTFESITSRM  | HACTAVAAICHYIAM  |
| IGPFRIEPIVPAVV   | AGSYTPFALLALPAH  | TGDEVTYRADIYALA  | GEVLLTENVEAGDIW  |
| AAPRSVGVPLYLLLG  | NNTGEIKSQTVMGMD  | VLRQGNSDRRAPKAV  | IVKDAPIRDWVKLAV  |
| FGVRLVKLLYRLERP  | WDINTPAFEWYYQSG  | AQRRFPLPDVIWTRL  | SAAPNFAFELAAARR  |
| AQRRFPLPDVIWTRL  | DGMFKDEFERVYEEE  | LHSVVKVPSRGAWLE  | EAHGTGTPIGDPIEY  |
| AFNSGSFNNGALWTG  | ANSGNVDTGALMSGNG | YAFLPIVRAFAEPAG  | GTSEORDERDLVSR   |
| GSLPTIGPLYSSKTI  | PVPEPMVKMLLNNVL  | CVLGECTGAPPYRA   | AEHTGKLVLDVPRSG  |
| PEQDWLNSEEFDAI   | AMSLTVGAGVASADP  | GSWLTMIRLAKCGPW  | ASTGQRSRGPSSKFRM |
| VEAEYELMWAADVAA  | MSSLGSSLGSSGLGG  | ARLAGIPYIAIANAY  | IAYETVQTADGALPL  |
| EVLYELSPIEDFSGS  | MLRDMGVEHVYDSRS  | SVTLSVEQQLARQR   | VGNLRIARVLYDFVN  |
| RSVGVPLYLLLGWVA  | VPIHDYGEINGQFFV  | ASAFQSVVWGLTVGS  | AAVDAADKVLGYRNV  |
| NFEQLMSGYFADTDG  | LCKTTSNFIWGQLLL  | AFIGEHEPSDLVYGD  | VLNRDRNYTAPGGGQ  |
| TTVLPFNGLYQPQGL  | CTHYPLAEAADAIRA  | VTLAHVVRPFALAQS  | VGEQLSGLSSAGTAL  |
| WDSLGEFLALGAGFE  | YILLVSSKVSTVKDL  | FVALPAATADAYATT  | ANSGNVDTGALMSGNG |
| GFGPFPEFPAIPGFP  | YFAAYVITSVDEEMR  | EPRVLVRRKAGEVEY  | FFNSGAGGVSGFGNF  |
| IRGTFKSVAVKAPGF  | VMPVGGQSSFYSDWY  | APPPIAHSTVLVAPV  | GTGSTGLFNAGGFTT  |
| APAPPPFRLPLLNVN  | RSFIEYGLDSLGMLE  | TPGSITYNEWSFAQA  | SYNTGIGNSGVASTG  |
| LAFVCAVDMPLYLTV  | DEALYTEDDRAWTEAV | LDVAEGDTVIYSKYG  | AVCAPITGVLPPAAN  |
| TIPLNIHQTFSLGPL  | GFSSMLWGGGSLPTI  | ELTSAAVSYGSSVST  | RPVIGAPVDALVNLA  |
| GPYQLLRLLGRGGMG  | GLPSNMDQHLNMEAL  | TGKIYFDVTGPSPTI  | GFPEFPAIPGFPALP  |
| VATGEVLLTENVEAG  | LIATGEQVLVNEHLI  | LLGPLPFPHPIHTV   | RRAVQTDAAEVVLPWD |
| LGPVLWSPDVKPPTW  | ALGITGQFRFGPITV  | AVERAGAGVLLRTER  | VLANGDEVQIGKFR   |
| HIPQLVASQSFAAAK  | ERAGLEVRDVHPSHY  | FEATLAATVSPAMVA  | MIGTAAAVVLPGLVG  |
| QAWQAQWNQAMEDLV  | PTCSQYAVDALTEYG  | HMEVGSPIYAVEYVWG | FLENFVRSSNLKFQD  |
| AGVLTVRVAGAYKAP  | MTYAAPLFVTAEFIN  | EQPTIITLTDEAPL   | WEYWGAQLNAMKGD   |
| ENAMEQFVYAYVRSC  | DDGQEQRAQGACTIT  | MESRVTPVAVIGMGC  | TVTTGIVSALNRPVS  |
| FGEPSSGFSSMLWGG  | YTPFALLALPAHDGR  | TLAATVSPAMVAANR  | NHVIAGATDINAHSV  |
| AVHDTLFCVANMPA   | FFGTSQLSQFMDQNN  | GLVGFSYSIEITGST  | LQLRGAGGLPSAAIG  |
| EKIPLLGHLSWELA   | ANHEYLGPVLWSPAG  | VTIPTITTSPIPLKI  | LTVRVAGAYKAPAET  |
| AAVEAAEEQSEFDVI  | GNNSPA VYLLDGLRA | EVHFACDPRFNKLLG  | QFEAAGLTYEHLRID  |
| ATPADAYPTVDYAFQ  | PLRLVYSDGTATGAA  | VVGDNRSLSVSARL   | AISMYCPSVMADVAS  |
| EDRQSLSWTLESSSL  | FRHHAIHTIPSERFF  | IGRHGLIGFGESYMA  | AAPEIQLAVQATPTF  |
| VADLVLVAPGSIPIT  | HMEVGSPIYAVEYVWG | GTAVSARNTAVCAPT  | YQQRSEKVLTEYNNK  |
| GVYAVNYPASDDYRA  | LEMRRPTYVFAAVDH  | SLSVYARVNPFGFIE  | CVAYIGISFLDQASQ  |
| SVTLSVEQQLARQR   | TSEIEPFIVWTSSGA  | PTFAVHDTLFCVAN   | ISMIDGPAPDGYPII  |
| VPSVTIPALTAARAV  | KLLSSILTYHVIAGQ  | MGQGNDLVLDTSSFY  | DSLTSQVGGRSIGVY  |
| EYPSTAYLQYTSGST  | PLTLVHAVSPEVATW  | VKVIPSRGAWLEFDV  | YPASDDYRASASNGS  |
| LPIVRAFAEPAGIKI  | AQLASGNLGSNGVGV  | VVGTRQTLQGASVTV  | YDGVNDFPKYPLNVF  |
| HPTTTYKAFDWDQAY  | RDGSYIITGGLGGLG  | GKNLLVAIMPWEGHN  | LVLRPSWSPTQASGQ  |
| FGFGNIGNANFGFGN  | EAGFRSGYLDVYQWT  | HLGWCAHSGWKVDAA  | LLSTLPQRVAVRVSQ  |
| PTATLLDITYSPELFC | VNARGGPGGAPGCWQ  | FPAQNFNTTFVPGPF  | RAAGGSASRANEYAD  |
| SSLTSILTYHVAVAG  | SGNFNNGILWRGNYE  | SSAWQGDTGITYQGW  | FEGRGEPRDDLIQVA  |
| FSNGILWRGNYEGLA  | AIELPAISFSQSIPI  | PRQMVS VATAMIPFL | DSIARQTCGDFELVL  |
| EAPYELNITSATYQS  | GLNVGITIPEFPIHW  | LSLSVSARLAGIPYI  | NLAELGRLTQLPDTN  |

|                  |                  |                  |                  |
|------------------|------------------|------------------|------------------|
| LRAIFGEKAREVRDT  | QAGLEKLGSQLRGRD  | DALARRIGHGLIGF   | QDKGYAVPDYPADPK  |
| TIFPGGFTIDPLPLS  | VSILYRLYRPLIFAL  | NSGVDISGMFNVSTL  | TEKLVAIHELKCRGD  |
| LGDFEVFARMWELYL  | GPPPATVIRLSDYPI  | LPDVIWTRLFGVRLV  | GGCAVLLLEPHACVAA |
| DWDQAYRKPITYDTL  | EALPERERTVLVLR   | CGGVSTANATVYMID  | RVAQQLLSGSEEDET  |
| IAATQAEYAEMWAQD  | NTGFLDRTRGDEIHTS | VKPENILVTASDFAY  | FLAEGGEIMITPEEG  |
| GILWRGNYEGLAGFS  | SGAGGVSGFGNFGAG  | PFTGIDFRLSPSGVA  | GAPWLADLVRRSPWG  |
| LDQVHFQPLPPAVVK  | GTVTRHYRQYQAGKP  | PYAVEYVWGRQVGDN  | NHLKNVPANAFVADY  |
| VPGRSVSRWGGFLDD  | DIRQWSYGEVKKPET  | LPVEYLQVPSMGR    | TETKNNFRVAITPA   |
| DSLLPLNIPLELYA   | VGNLRIARVLYDFVN  | VIRLSDYPIYVPLID  | SAITDADFKAAGAQL  |
| NTTFPVGPFGLGVV   | AIVADIERYPEWNEG  | QVLSGAEFRQAARRL  | GSRPPTYDHPFVAVH  |
| LGEFLALGAGFEDIG  | SINFADVLIAGFRFP  | PSSGFSSMLWGGGSL  | VNTGWLNTGTNTGTI  |
| AINAHLTGNAAMGAF  | ATFLETPSQFPFTG   | YYSATLFDPREQPVC  | PGGLNIPQNAIPLTI  |
| FPAQNFTTFPVGPF   | NIGIGNIGDRNLGIG  | WLSDHQVHNVAALPG  | GVLDPITIFPGGFTI  |
| PTNAAFDKLPAATID  | FLFTQYLSKQDPEGW  | DPTSDIAVVRVQGV   | FPGLTFPANSLLNL   |
| GAGNVGQQLSGVLAA  | FDPREQPVC DGAYWV | VFGGKYVSLTTPKNP  | GLAAGLAGMGNIGL   |
| AIVADIERYPEWNEG  | AQQTVTGIDKVQPAV  | ETNRDGETTRHATAA  | GLPLSLTIPGFTIPG  |
| MVIPPIVFLPSMTIG  | KLAAGSKTQTVLPFT  | SPYAQRFPPLDVIW   | LALLAGVFGGAASCA  |
| LMASDFHAFSAAPNF  | RQRPRAGMLAIGAVT  | NGGEYTVFAPTNAAF  | AGTLQSLGAEIAVEQ  |
| HDRAYSGYIPILGAP  | DALFTGLIAIHGLKA  | APKDLEKIIYFAAYV  | TLPVPVLRDELPLGL  |
| VAAEGPFASVYFDDS  | HAVRIFYKDAFAKHQ  | GKSPGFGTTVDFPAV  | VCAVDMPLYLTVELIE |
| EPRVLVRRKAGEVEY  | LSEVERQIHEIVRAY  | HIRSVTLVVEQQRLA  | ELLPEAAGPTQVLVP  |
| EIPDRWDADDYYDP   | FNKLLGPLPFPHPI   | LPNISASVPQLVAAI  | RVQGVSGLTPISLGS  |
| VIVRELTEVQGEVD   | PVDECKDKDMTYAAP  | TRYMHVVVASYNEFG  | DGMFKDEFERVYEEE  |
| SAPQGLEYYVAFLGA  | YLQFRGEFTPKTQLT  | SPTAATLHALHYHQV  | ATACEASLDQQRQWI  |
| FGTAFAMTVPPSLVA  | YTYPENLPRVNARGG  | DIPAVTITGTRIDPI  | LNALADAVKVTLGPK  |
| AEHTGKLVLDVPRSG  | SAAPNFAFELAARRT  | IHIPSIPLGFAAIGH  | GVNLPGTAVVPLHRS  |
| SIARAKGAEIFATAG  | APGCWQPITRDLWPA  | ADVPELVPTYNLPAN  | LARDSIYYVDANASI  |
| WGGGSLPTIGPLYSS  | AYAFETLVRHDRAYS  | LQTTDGSITYNEWSF  | RPGLDELSFTLTGNP  |
| SLSVSARLAGIPYIA  | ILDVDPRYIHLIPAN  | EYAEMWAQDAAVMYS  | PVTAGWNGYGDFOHT  |
| AIVGLGTPALVSGAG  | PPTPISVIFRSKSG   | GVAANLGRAASVGS   | GAADPRAPSLFIHRP  |
| AGKRRATIEQLLTIP  | PNAGLDPVNYQNFAV  | VTRSALQNAASIAGL  | FSHIIPTLNVAAVLP  |
| QNFNTTFPVGPFGL   | YEDAIIILSNRLVEED | GNNSPA VYLLDGLRA | RILAEFPDYLTTEEQR |
| DLYSKIESLPASQRD  | GSLPTIGPLYSSKTI  | ERDERDRLVSERLLT  | ARGISNFHSPSDVIV  |
| LVTEIPPDRWDADDY  | KIDRLLDVAGVQQGS  | NGARVQRVVGSAAPAA | VVPLMAGGMYETGA   |
| LLAKSGKTIVLKPEV  | RAAHADPCSDIAVVF  | RFGFSIPQLGFTLSG  | APKHVKQLVEENHLR  |
| DLPSFPFGPFPEFP   | FQVIYEQANAHGQKV  | QTYGVDVVGYDRTQD  | LGEFLALGAGFEDIG  |
| PITISPTLFPANF    | GLDSLGMLEMRTHVE  | GSDFVSFAVPTIMGE  | GNERAKLLGKTLDA   |
| DSRPAVQQRGRALIA  | VDHTGADV KLYQGAT | PYLVMDTGASLAPYN  | HPHAVNGTAMRESFA  |
| VALFGEPPSSGFSSML | DQHNLMEALERAGAG  | DAAAMFGYAAATATA  | VYDSRSVEFAEQIRR  |
| RILAEFPDYLTTEEQR | SGAEAIARAWQQIVL  | KSHGPGQTECASLSW  | GYGVDIVLNSLTGAA  |
| ISNFHSPSDVIVDAS  | PPGSALLVVKRGPNA  | GPVLWSPAGKPPTWW  | TGTQVGD LAEGRAIN |
| WAQELAAQTDDQQLA  | IADIEAYPQWISEYK  | TGLFVPQAVTPWPNG  | PIDIPASTINGISMS  |
| ALSKLTPWKAPPPIA  | MLKGFAPAAAAQAVQ  | GFGNFGAGSSGWWNQ  | LNPNV TGSVGFPIA  |
| IYSKYGGTEIKYNGE  | WRGNYEGLAGFSFGY  | ARIFAGAGLGPMLAA  | VTIPALTAARAVLDM  |
| QTDVDGANDDWNPAS  | GPVLWSPAGKPPTWW  | TNFKVDQPGTVTLTF  | VASVLEVVVNEGDI   |
| VVWGLTVGWSWIGSSA | GVLNSGVDISGMFNV  | IDRKRQPVTVLLKA   | AAGTVSKVA VSVGDV |
| PDRWDADDYYDPEPG  | MELARAVKDVGAGRS  | KLTADGVLTAPQCTH  | HTHDGTRTWRTRGRA  |
| PSSGFSSMLWGGGSL  | EYLQVPSMGRDIK    | LYSIGILYAVRWPD   | SEQAVLSSAWQGDGTG |
| GPPPATVIRLSDYPI  | VKVIPSRGAWLEFDV  | AGADAKLIIASAYLP  | QGWQTQWNQALEDLV  |
| RHGLSSLGWNLCRIF  | PAGRLVDAPLPAWTH  | YNGWDINTPAFEWYY  | DWDQAYRKPITYDTL  |
| LTKNEDVIVRELTEV  | LRAQDDYNGWDINTP  | PQPSQLRPGRVPPAL  | YQNFAVTNDGVIFFF  |
| AIPGFALPGLPSIP   | AINAHLTGNAAMGAF  | LGFTIPGFTIPAAPL  | GIGGAAASLVGFNRA  |
| DSLPTDRPIVYATLG  | LSGSEEDETAWRNGD  | PGGTFESITSRMAEI  | PINSADALVA AVRSK |
| RWLRDFFGPAATTDW  | LGDFEVFARMWELYL  | ASVGSLSVPQAWAAA  | GFAIPIGQAMAIAAGQ |

|                  |                  |                 |                 |
|------------------|------------------|-----------------|-----------------|
| SIGLGFAIPVDQAKR  | QIADRMFLAEKTVKN  | KDFDGRSEFAYGSFV | GGGSPTVHIGPTAFL |
| WRSLDVEMTAVQRSF  | RDQARRNIAVHYDLS  | LFVGEAATLAHVVRP | LPGVSEHLKLNKQVL |
| SLTGAAQRAGLELLP  | NYEGLFSYSYSLDVP  | WPAPYLVMDTGASLA | GGTNSSSSGAGGTSG |
| NTRLVWYCGNGTPNE  | RRPTYVFAAVDHTGA  | GQVWEATATVNAIRG | CGGKELHSSGSTAQ  |
| GLEEVLYELSPIEDF  | DTGITYQGWQTQWNQ  | YLDVYQWTLIREGPP | VRAFMQAAIGPGQEG |
| VVISAPQGLEYYVAF  | EVHFACDPRFNKLLG  | LPTVTIPTITTSPIP | DTDSFYRPKRPGSYP |
| VAIVAAAGYLVLRPS  | WQGDGTITYQAWQAQ  | SMYSYPAMTANVGDM | FGKPANPDVLVVGNG |
| GDYTTYADVPELVPT  | LNLDFVFGTPGATIP  | KPQEGTVVAVGPGRW | VTALVMGGTDSLPL  |
| MTPRSLVRIVGVVVA  | GSQFYLAMywaQELA  | LGADIASERTAPSRA | GIAVDEAGTVYVTEH |
| ANRTRLASLVAANLL  | TIPLAKELAWAPDEI  | RLVSRLLTLGWQQR  | QLVRSFGVYFDETID |
| DDYYDPEPGVPGRSV  | GYPAVLTSVPSFLQR  | MNLRRHQTLTLRLLA | FDVDKRDVTGVRIDR |
| GYGVDIVLNSLTGAA  | LMDAAIFKDTLIMSY  | ATYEIVCSKYPSQV  | QPVTVLLKALGWTS  |
| FPVGPFFGLGVVNIS  | SVTPAVSQFNARTAD  | GYLDVYQWTLIREGP | AVGSAKAGLTTLAYT |
| SLGWDLCRIFTDGDY  | LTSILTYHVAVAGQTS | RPGLPVEYLQVPSPS | DSRPAVQQRGRALIA |
| ATYEIVCSKYPSQV   | QAQWNQAMEDLVRAY  | PNGTHSWEYWGAQLN | RTATHLPLRLVYSDG |
| NLCRIFTDGDHTLYA  | IAAAEAEYEQIWAQD  | RYRVLADWDFNIRCF | SSYHTLSIDSGGSD  |
| EEEFKAQFEAAGLTY  | LTTYILLPSQDLPLL  | VKTGSDFVSFAVPTI | GRIAVPLSVPGGVT  |
| RRATIEQLLTIPLAK  | LVRHDRAYSGYIPIL  | FDKGYISGYFVTDPE | MGHSTASAGTVGLIK |
| FFNSGTANFGLFNSG  | KTVSPHRSPISNMVS  | PGGSFNTAVASVVAR | LGSQLRGRDGVVIVY |
| GVSIKEIELEDPEYE  | GLADVGNYNLGLGNV  | AWRNGDWYVARLTPS | QAITAATAHATAWYG |
| RDQARRNIAVHYDLS  | VLTACGGGTNSSSSG  | SALLVVKRGPNAGSR | VSILYRLYRPLIFAL |
| SSVPIIIVPPTPGFG  | PDRWDADDYYDPEPG  | LGLFPFRRGLTFYYL | TVPANAFVADYLPGE |
| ANRRLMSLVAANIL   | LGLFPFRRGLTFYYL  | FIDDDGQEQRAGAC  | ARSAVVVCNGGSLTT |
| EPGVPGRSVSRWGGF  | VSPFPGLFPDWDWAE  | LPIVRAFAEPAGIKI | ANGMGATVTVDINI  |
| GGTHPTTTYKAFDWD  | YNKVRGDKVIAYARK  | TETGIRLTPKVIATN | LINSRTGSIYVKKPK |
| DGRSEFAYGSFVRTV  | GPFGGAAPVSAGVGH  | IPEDGGVVLGMYNFK | SADVRASLERMAPLV |
| DRMFLAEKTVKNYVS  | SRQSKTAASPSRSP   | QRPLYRRDGSYIITG | GPLVVPDIVIPAFGG |
| STLTEEDVVATIEYL  | WTSSGAIGPTWYSVG  | TPGFGNTTAPSSGF  | NTGALITGNFNSGIL |
| YFAAYVITSVDEEMR  | LSKQTGQQVSIAPNA  | FPVTVNWSTPAVTIF | ALVHGMFVALPAATA |
| QPGSYPIVLATYIEIV | RPSFSFFAVGPDGMP  | SASIGTLGFTIPGFT | AGYAGTLQSLGADIA |
| LPGLVGLAGGAATAG  | GTGPPTPGAARWSPG  | PSQFFPFTGLNSLTY | LPTVQVQTATMGQLQ |
| SDFHAFSAAPNFAFE  | GLPSIPNLFPLPLGL  | AQYMREHDIGALPIC | SPAVYLLDGLRAQDD |
| AVVEDATLNTITDEL  | HAIHTIPSERFFGNL  | FVRNVGHLMTNDAIV | WDINTPAFEWYYQSG |
| RSIGVYAVNYPASDD  | GPKGRNVVLEKKWGA  | VVLPFTDITAPWGIA | VMPVGGQSSFYSDWY |
| LSEVERQIHEIVRAY  | TEGLDIQIMSQVRSM  | ARRIGRHGLIGFGES | YQSAIPRGTQAVVL  |
| FKDTLMSYEWPEDR   | EASDISVAARILAEF  | HAIHTIPSERFFGNL | VPGRVVALGQTVQAS |
| LRAAGADIVVECGNI  | TPGSITYNEWSFAQA  | TVFAPTNAAFSKLPA | AENRAELMILIATNL |
| YVWACKNYDGDVQSD  | EYAEMWAQDAAMVMS  | GDYTTYADVPELVPT | PEWNEGVKGAWVLAR |
| ANFLFNSSGSYNTGI  | IGPFRIEPIDVPAVV  | TIPLNIHQTFSLGPL | QLELTEGMRFDKGYI |
| SEFNGNQTDFFGGSDV | DSIAFLAAQELILSG  | VSAATATGLPLRGVL | SFYRPTQPGSYPIVL |
| GFDNWEGDAATAACEA | RSVGVPLYLLLGWVA  | AINAHLTGNAAMGAF | NRDFTLPGERIHVVV |
| FSVSGSQTYGVDVVG  | DIVIPAFGGGTAIPI  | PAADLIGRGCAQYAA | SMLWGGGSLPTIGPL |
| AEYGEMWAQDAAAMF  | DGNPPEVKSVGLGNV  | DIKATYDKGILTVSV | EQVLAERLAGWQERY |
| NEFNVDVGSNLNGTY  | VQFQSGGNNSPAVYL  | PLIFALYCLPLNWLR | KGTFIINGTERVVVS |
| QQFTYAGSLSALLDP  | QVTIDAAYAIAKKGHV | GEMWAQDAAAMFGYA | LFDRSGEPFPYPVT  |
| CWAMQAYGAAAYTLQE | SPSGVAVDSAGNVYV  | TTSTVLPFTGLNTPL | TKRRITPKDVIDVRS |
| HQDVPSPFGLFPDVD  | NLGSNGVGVGNIGND  | EMTAVQRSFNRTLLS | APGCWQPITRDLWPA |
| PAGRLVDAPLPAWTH  | APAQAAPPALSQDRF  | VGHGDRGPVWVFSGQ | AAARGAHIRSVTLVS |
| RVYEEEFKAQFEAAG  | PGIGNTTTVPSSGFF  | DMVAACKLWEGGYVW | DLSQRLGRAPSASEL |
| AGFGHRVEIDLCDYR  | VDTLNSGQYTVFAPT  | TSEIEPFIVWTSSGA | EIPEDGVANIVDVAT |
| PGTNWIGQAAEAYLN  | PLTPARAVAIVRQIA  | ILDVDPRYIHLIPAN | PNFAFELAARRTTDD |
| ERVVVSQVLRSPGVY  | AGEVEYVPSSEVDYD  | FAAFPSFAGLRPTFD | GTGTPIGDPIEYRSL |
| RKTGELDNRSQFYL   | YDPEPGVPGRSVSRW  | TPALNIHQIPLGFQV | QVALAATMEQTYGVV |
| EDGVANIVDVATGEV  | RFVEIGKADVYGNTR  | GFSYSIEITGSTLVD | SLGMLEMTRHETET  |

|                  |                  |                  |                  |
|------------------|------------------|------------------|------------------|
| PDVLTITYILLPSQDL | DLKSSTAVIPGYVPA  | ILTYHVAVAGQTSpan | ALAAGVPVIGLPSNM  |
| QIHEIVRAYEWAHHD  | NITSATYQSAIPPRG  | IDSDRWPAVAKVPRG  | DHTLYADVPELMPTY  |
| PAVAKVPRGPLAAAS  | VTGCAETPGCVAYIG  | LIGSLSVYARVNPFG  | ANHEYLGPVLWSPAG  |
| ITPVHPGYTATFLET  | LVAGLIAPPLAVAAAN | DHQVHNVAALPGAAY  | NTGAFISGNFNSGVL  |
| DVSVLTAARFTAHTK  | LPLPNIPLELYAARF  | AVRWDPWPPTTFGYH  | SGMFnVSTLGSAPAV  |
| RSVSRWGGFLDDVAG  | DVSGGLPAFTLFPGG  | ASCRFVPTCSQYAVD  | STGLFNAGGFTTGLA  |
| IQQLAALGDVYADAA  | GAANAGSGNFGFGNI  | RNTAVCAPTTGVLPP  | ANSGNVDTGALMSGN  |
| GLFGLNVGITIPEFP  | PLSKDEAAAAQRRCG  | QLVASQSFAAKAGL   | PGATIPAITFPEIPA  |
| GFTIPAAPLPLTIDI  | LLAKSGKTIVLKPEV  | VKEVAKKTDVAGDG   | GDLPTIGTAVSARNT  |
| RPSYGLAEATVYVAT  | ADAYPTVDYAFQYDG  | KVRRGACVEQYRQDQ  | APTTGVLPPAANDVS  |
| GYISGYFVTDPERQE  | MGQGNDLVLDTSFFY  | SGQTVLPFTGIDFRL  | SVPANVSRRAKVDVL  |
| MYSYEGASAAAALP   | SNMDQHNLNMEALERA | IQMSDPAYNINISLP  | EFPAIPGFPALGPL   |
| TQAEYAEMWAQDAAV  | FPVGPFFGLGVVNIS  | ANATVYMIDSVLMPP  | TAAAVVLPGLVGLAG  |
| IAALNAGVNYGDPV   | PAVISGFGNLGNHVS  | VNPVLRQGNSDRRAP  | TAGAFSRPGLPVEYL  |
| TEQKDFDGRSEFAYG  | HRRRREFKARAAEKP  | PSIPLGFAAIGHIGP  | NGEYLILSARDVLA   |
| QLPDTNIIKLPNISA  | VEYVPSSEVDYMDVS  | QVTIDAA YAIKKHGV | IAGATDINAFSVGSG  |
| LRAQDDYNGWDINTP  | LLSALGITGQFRFGP  | YILLVSSKVSTVKDL  | GVDVVG YDRTQDVAV |
| LFVTAEFINNTGEI   | LFVTAEFINNTGEI   | LAFVCAVDMPYLTVE  | FSAASAFQSVVWGLT  |
| RQRLATSLRNAAKAY  | NFPNGTHSWEYWGA   | VPPLLHFNRLPDELS  | EIQLAVQATPTFSSS  |
| AGGFTTGLANAGSYN  | DAFETGVMFSLHVKA  | AAVMYSYEGASAAAAS | LAQALVREGLRNVA   |
| AIGAVTIAVVSAGIG  | AGGLASPYVVTGLNN  | VLMYSGAGSSPLLAA  | PLGLKRGIEKAVEKV  |
| LVLDTDSFYRPKRPG  | LELADHWRAACRSN   | KIFNGTITVWNDPQI  | ELCRDLLSRMPDLRC  |
| GTSEDERDRLVSR    | PLLEYAARFITPVHP  | TSTNPIASIFAWTRG  | VHSEIVPAAA VPTLV |
| GSGQTYGVDVVG YDR | GVGNIGFANTGSNNI  | RSIGVYAVNYPASDD  | RLLGSVSSGLLRHAH  |
| KTNSLLTSILTYHV   | IPANADGELYVIAGD  | AVKVTLGPKGRNVVL  | VNDFPKYPLNVFATA  |
| VAVLQLRGAGGLPSA  | ANSGNVNTGAFISGN  | IRQAGVQYSRADEEQ  | AGILFLHSGLIALLP  |
| AFSRPGLPVEYLQVP  | AARKLETGDQGASLA  | IGPYNLRYRVLADWD  | GIDFRLSPSGVAVDS  |
| EFPIHWTSTGGIGPI  | ILPYLDIRLDYYDLG  | VLSWLSDHQVHNVA   | AAPRSVGVPLYLLLG  |
| LTNATMPYVLELADH  | IAATQAEYAEMWAQD  | IGRHAFGDQYRATNF  | TLPQRVAVRVSQ LHA |
| VWYTATILHNAGVTA  | EPWMGPAAAAAMAAAA | VDPRIYHLIPANVNA  | CAMFTDLLAQPTPAW  |
| SDALRQTARQLATWV  | GIGLVAGLIAPPLAV  | DHSRDQARRNIAVHY  | ELGRLTQLPDTNIIK  |
| CAPILGGYPAVL TSP | TQTGTAVGTYN YMAP | NFQLSQGGQGF AIP  | ISASVQLVAAIKEL   |
| ERDERDRLVSRLLT   | TIFREPVISNV PRL  | PIHLGLTGQANYGFA  | IKERYARCLGSAVNP  |
| LPDVIWTR LFGVRLV | GGAAPVSAGVGHAA L | TDGSITYNEWSFAVG  | KAVNPESTFSRIYQE  |
| GLELLPFGGRFVEIG  | GVSIKEIELEDPYE   | VAAELTSAAVS YGSV | GLREVADGDALYDAA  |
| AYETAYGLTVPPPVI  | VSARLAGIPYIAIAN  | LNSGQYTVFAPTNA A | VQFAAAVQAAMEDGY  |
| WVA VWYTATILHNAG | KRRQPVTVLLKALGW  | PGFTIPTGPIHIGLP  | ACLRAYQCPLL LHA  |
| ASDFAYLVDFGIARA  | EVGDGEAGSWLLIDT  | AAAGSFASVTTGLAG  | PEVDTNRLMVSIGTG  |
| YDGVNDFPKYPLNVF  | QEMLNVMEEHQVRRV  | AATLHALHYHQVDVA  | GLERHAKAGVMT PVS |
| GFSSMLWGGGSLPTI  | YQEIINFCKTNGQFD  | LYADVPELMPTYDLP  | GEPRPGNYRYAINNS  |
| CWPAAPRSVGVPLYL  | YYSATLFDPREQPVC  | GMLAIGAVTIAV VSA | KNVPANAFVADY LPG |
| NTARPHWIGLYGNAG  | LTKNEDVIVRELTEV  | DIASERTAPSRACQG  | KNNEFRVAITPAGVA  |
| NSWVDVFAHWPR AQG | LYLLGWVAVWYTAT   | LLVVG NVGLSTIAGR | PTTYDHPTFAVHDTL  |
| DPITIFPGGFTIDPL  | GTGSGAGIAQAAAAGT | TIIYTLTDEAPLLAT  | LNIPQNAIPLTIDAS  |
| ATMPYVLELADHGWR  | LDGLRAQDDYNGWDI  | MLPRSPIVRIVSDST  | PLGFQVPGSIDAITL  |
| ASAFQSVVWGLTVGS  | SAGTVGLIKAILSLR  | QVVLNALADLPVTVI  | LSLTIPGFTIPGGTL  |
| SLLKSLEGT YRLAP  | VVPVLNARFALNAAN  | NFPNGTHSWEYWGA   | AMEDLVRAYHAMSS T |
| RPSFSFFAVGPDGMP  | AWGKGASETFNGG V  | VNKIRGTFKSVAVKA  | MSAYKTVVVGTDGSD  |
| GEAATLAHVVRPFVL  | TSYTSDEAMLDAILA  | FALAQSLDPSRYEVH  | IEMLTTLPKFPGLP   |
| FAAFPSFAGLRPTFD  | IHWTSTGGIGPIIP   | TSEQIVERFGFSEIM  | IRGSVTPAVSQFNAR  |
| FYLAMYWAQELAAQT  | GRSGEPFPYPVTVGY  | HHDMVPLAQIYNNRA  | ATIPQGEQSTGKIYF  |
| VGWANMGLGNIGFGN  | AGADAKLIIASAYLP  | GQTYTIPLDTPPAPA  | GLILTNNHVIAAAA K |
| DAEVVLPWDGRNHYL  | QLHVWARREHPTYED  | TAYGLTVPPP VIAEN | SASLVAAAQMWD SVA |
| SMLWGGGSLPTIGPL  | NLVDTLNGGEYTVFA  | TVLP IQILPTIPLNI | TDWYRPVAGDFTPAA  |

|                  |                      |                  |                  |
|------------------|----------------------|------------------|------------------|
| NGDEVQIGKFRVLVFL | VLADWDFNIRCFNSNP     | LPSQDLPLLVPLRAI  | TIAYDEEARGLERG   |
| LFPDLPSFPGFPGFP  | WQGDGTITYQGWQTQ      | SLTGAAQRAGLELLP  | RCGSPAOWLPTVFGP  |
| FAYLVDFGIARAASD  | PLLLAAAGCGSKPPS      | PANAFVADYLPGEAA  | TYNIKGVSTLNLDDGP |
| FKVRPSFSFFAVGPD  | AIAELRHLNPLNIVN      | AQFGGQRFGECECWA  | PLPPGVLRWQQDHGR  |
| VDVFAHWPRAGQLPV  | DETAWRNGDWYVARL      | TTSEQHQAATILRRG  | GLATAEDIRQWSYGE  |
| VNDFPKYPLNVFATA  | SIIDIPALPGFGNST      | VNLVDTLNSGQYTVF  | LAAGNEVVVFGTSQS  |
| VFLPSMTIGGQTYTI  | SYDAGVLTVRVAGAY      | RLDTAVQGIEGTYIH  | LKLISPYSDNAVFR   |
| IYATLGSSGGKNNL   | NFIWQLLLLGEGIP       | NATVYMIDTVLMPPA  | TPLAVAVDSDRTVYV  |
| LRISLSVSARLAGIP  | RNILGGTIFREPIVI      | MHVVVASYNEFGGLS  | VAQANSPIDADGRFV  |
| PFTGIDFRLSPSGVA  | KYGGTEIKYNGEYEL      | NLVDTLNGGEYTVFA  | SPELFACTIRNFYDAD |
| HPTYEDIVGLERLYA  | VAAICHYIAMWVVFV      | VGATSEIEPFIVWTS  | YTPFALLALPAHDGR  |
| QVLSGAEFRQAARRL  | LTVRVAGAYKAPAET      | SQFNARTADGINYRV  | PEVVFVSGEVRSRTD  |
| GPRKSALDEEEIWDL  | FRLVFLTGPKQGEDD      | TAQENAMEQFVYAYV  | DPRAPSLFIHRPDAL  |
| NTGAFISGNFNSGVL  | GTAVLAGASLVAVSW      | RHAKAGVMTPVSACA  | HTGLRIVDAASLRPH  |
| MSFVTIQPVVLAAT   | DPAFTFMDYEQDWDG      | FTDGDYTLYADVPEL  | ISNFHSPSDVIVDAS  |
| LLGPLPFPHHIHTV   | GAKIVEVVAGGAAAN      | ATVIDLSTSAMPNAV  | SPGDAEVPRLFMLS   |
| STGLFNAGGFTTGLA  | IGIGITGNGQIGFGK      | TQTGTAVGTYNMAP   | QDCVAASDLAYTLAR  |
| EIPEDGVANIVDVAT  | IVDAGDRVEAGQVIA      | PLPDVPWTRFFGVVP  | RPAVYAPKSALGHSV  |
| SSAGLMVAAAAPYVA  | NFEGFLGLNVGITIP      | GVPLYLLLGWVAVWY  | GAVESILTVLALRDQ  |
| VLMVVGCLGSGRWPG  | NFAGIEAAAASAIQGN     | NTPAFEWYYQSGLSI  | ARKFLDDSVPLSSGS  |
| FPFRRLTFFYYDLA   | KVVREIVSGLGLKEA      | KYIFPGGLLPSTQAI  | PILHRRRREFKARAA  |
| PDYLTEEQRVPDNLA  | SAAIAATQAEYAEMW      | GQRCAPVFMMAAPGQ  | MNFPVLPPEINSVLM  |
| IEPFIVWTSSTAIGP  | KTNSLLTSILTYHV       | PPTPGIGNTTVPSS   | PAVTIFPNGISIPNN  |
| FVEEFDLPVRIGGHL  | ASGNLGSNGVGVGNI      | PGQPLPTLPVPLVRD  | LLASASIGTLGFTIP  |
| EYAARFITPVHPGYT  | MNFAVLPPEVNSARI      | CRIFTDGDYTLYADV  | LPAISFSQSIPIDIP  |
| KAVNPESTFSRIYQE  | LTPKVIATNKARAL       | LNIHQTFSLGPLVVP  | TIGGQTYTIPLDTPP  |
| AGILFLHSGLIALLP  | VVPLIDLEMRRPTYV      | TIGQAEQAAMSAQAF  | NVGFNGSGLGAALGI  |
| LHFPGFITPTGPIHI  | PGLPDIPGLPDFKWP      | DAEFCGRIHTRYSSA  | TWYSVGRIYNAGDLF  |
| ASVGSLSVPQAWAAA  | NEGVITVEESNTFGL      | MYAGPGSASLVAAAQ  | LEAAGDKKIGVIKVV  |
| IGLFNSGTGNIGFFNG | PRYASRMPVLSKTVE      | ADGRFVEPRVLVRRK  | KGLEKIPLGLHLWSW  |
| DGGILTRFGFSIPQL  | NGMSRDMASTFTIVA      | PGLTQTGTAVGTYNV  | FRADFLSELDAPAQA  |
| EGGEIMITPEEGAYA  | AAVEAAEEQSEFDVI      | AVLTSPVSFLQRPAR  | KTNSLLTSILTYHV   |
| TLIMSYEWPEDRQSL  |                      | GLAVDTQGAVYVADR  | QVVLGWKVSCLKSSST |
| GVLDIPITIFPGGFTI |                      | LAAAGCGRIVLTARS  | GAAASLVGFNRAPAG  |
| GSGVLNFGSGVSGLY  | <b>HLA DR1 cont.</b> | ATDINAFSVGSGQTY  | GPVAASAAPSIPAAN  |
| PIIIVPPTPGFGNAT  | DEVFARMWELYLAYS      | WGGGSLPTIGPLYSS  | IPIGQAMAIAQIRS   |
| SPGDAEVPRLFMLS   | SAAPNFAFELAARRT      | PPEVNSARIFAGAGL  | PSSKLGGLWKTVSPH  |
| VGNLRIARVLYDFVN  | RFVEPRVLVRRKAGE      | IYATLGSSGGKNNL   | SNVPRLVPGWTKPIV  |
| TVYVTFDFNNRVVTLA | FALLALPAHDGRVVL      | VEYVPSSEVDYMDVS  | HAFGDQYRATNFKVD  |
| RFDVKTGSDFVSFAV  | GAPNRVSFAKLREPL      | STNNDPAGACRPFD   | TVTLTFTPADGSAPI  |
| QDEWAGRLRRLLEVEQ | LTGDNQGTIGGLNSG      | NCQSILGYVVRWVDQ  | WGGSGSEAYQGVQOK  |
| FVRNVGHMLMTNDIAV | PVLPPEINSVLMYSG      | TVGLIKAILSLRHGV  | FGDVAHGAMIRAQA   |
| SPNGTIRNILGGTIF  | VGHGDRGPVWVFSGQ      | LVLTTTAGGLASPYV  | LVSSKVSTVKDLLPL  |
| VWAVVGAIAIVLVAI  | LHSVKVIPSARGAWLE     | GTGVIDPNGVVLTN   | ALSTLVVNKIRGTFK  |
| AAIGPGQEGLDQYGS  | RNTVQFAAAVQAAME      | PPTVHSEIVPAAAVP  | LTVGAGVASADPVDA  |
| SQYAVDALTEYGLLR  | AACLKWEGGYVWACK      | TVYVTFDFNNRVVTLA | FAAVDHTGADVVKLYQ |
| AEELVFSYDDMRARG  | PGLTQTGTAVGTYNV      | RQAVPLVRSEAPLVG  | TDTLGDVDAGLDQIE  |
| ALGITGQFRFGPITV  | LNVMEEHQVRRVPVI      | NMQRQAVPLVRSEAP  | VLADWDFNIRCFNSNP |
| FFPFTGLNSLTYDVS  | KGTFIINGTERVVVS      | VYVADRGNRRVVKLA  | LFPILELGTSAKMLS  |
| LSGIGISLLSPLALA  | GVGNIGFANTGTNNL      | VGWANMGLGNIGFGN  | AGHAKPCAGGATSL   |
| ASGFANFGTQLSGIL  | MHVVVASYNEFGGLS      | SSLLTSILTYHVVAG  | STASAGTVGLIKAIL  |
| DTLFCVANMPASVP   | NAIAGILFLHSLGIA      | GYISGYFVTDPERQE  | DALKSHGPQGTECAS  |
| SYIITGGLGGLGLFF  | GNWGLFNSGSYNTGI      | VVVPPIPVLAINAHL  | TAATAHATAWYGLND  |
| TFTIVAIGTYCPAVI  | FGNTTADVDRGGPY       | DRTVYVADRGNDRVV  | LARIMGASITSDGFH  |

|                  |                  |                   |                  |
|------------------|------------------|-------------------|------------------|
| LQERVIRPSYGLAEA  | AMTANVGD MAGYTGT | GESGKVIGIRVFSRE   | AGFPQHIESALRLVC  |
| ENYIAQTRDKFLSAA  | AQLVVVGSRGRGGYA  | EFPIHWTSTGGIGPI   | VAFTCELF SRVEDVL |
| DAADKVLGYRNWLGL  | TIPEFPIHWTSTGGI  | IKKHGVGVKCATITP   | SSQLLANWLRHG VIT |
| PGIGNTTTVPSSGFF  | IGRHGLIGFGESYMA  | DVETGLFVPQAVTPW   | NTTFVPGPFPLGVV   |
| AVRDSRPAVGQRGRA  | TVLPIQILPTIPLNI  | WHS LPTDRPIIYATL  | GILWRGNYEGLFSYS  |
| RVVVRDQPARQLVQR  | TPIGDPIEYRSLARV  | YYAPDSDMTTAVMRP   | DVPRITILDAHFTGA  |
| SAAVSFGQVTSGLTA  | LLPFGGRFVEIGKAD  | IKSDDTVGRVKVYEA   | TSTLPLGTPALV SGL |
| ITPEEGAYAFETLVR  | ALVSWLFPYHDMGLV  | ATTVFGGKYVSLTTP   | GLAGFSFGYPIPLFP  |
| QPGTPGYAQGQQQTY  | NGE EYLILSARDVLA | FAVTNDGVIFFFNPG   | HGMFVALPAATADAY  |
| RYLQAASNGAWGKGA  | RFGFSIPQLGFTLSG  | GQYTVFAPTNAAFSK   | MGRDIKVFQSGGN    |
| CVAYIGISFLDQASQ  | LFDGRSGEPFPYPVT  | FQVPGSIDAITLFPG   | ENYIAQTRDKFLSAA  |
| IGIGITGNQIGFGK   | LFVGEAATLAHVVRP  | RYTCERLVRGLDTIA   | TPREAPYELNITSAT  |
| RDLLSRMPDLRCLIL  | DSLTSQVGGRSIGVY  | SILGYVVRWVDQGVG   | TLGADSADAQSGSIG  |
| LFNSGTGNFGLFNSG  | MGTQLLASEPVFAAT  | CCSGVATAAPKTYCE   | RVVALGQTVQASDSL  |
| FNAASQAFNTPALNI  | PLPDVPWTRFFGVVRP | FSNGILWRGNYEGLA   | AIAVNEAEY GEMWAQ |
| AAAVQAAMEDGYRVF  | DKDMTYAAPL FVTAE | HVSYVQSGMTSQAAT   | DMLILPYLDIRLDYY  |
| GTAVSARNTAVCAPT  | AAPEPVARRQRILFV  | VVLKVYQNAGGTHPT   | IEHRDATDDQVTIDA  |
| FQVPGSIDAITLFPG  | VFVMAAPGQPLPTLP  | PDVLT TYILLPSQDL  | PRYASRMPVLSKTVE  |
| VGVG NIGNDNIGNAN | LRIVDAASLRPHYAE  | DDLGVNVNNGLS DLY  | AAGAKERQLATSLR   |
| IIVGIDDSPAAQVAV  | NHLKNVPANAFVADY  | NRPDGGILTRFGFSI   | APTLDELKLEGDEAT  |
| RIYNAGDLFVGGNII  | TYALTNATMPYVLEL  | SRQSCGRVVRVTGRA   | IVKVALEAPLKQIAF  |
| LVLTTTAGGLASPYV  | VKEVAKKTDDVAGDG  | RDFFGPAATTDWYRP   | LNAQTGVYEDLLAAG  |
| RLVKLLYRLERPLLF  | ARSLDPSRYEVHFAC  | VSGLLNQASSPMVGT   | TLAETGSTLLYPLFN  |
| DTADRLVSAATATGL  | VVAGEPRPGNYRYAI  | PVAGQVWEATATVNA   | KGAGKSFQGGVGE GA |
| AGSYTPFALLALPAH  | VQFAAAVQAAMEDGY  | EYTVFAPTNAAFD KL  | LAERLAGWQERYPNV  |
| FEWLIGSPRWRESAA  | GFPEFPAIPGFPALP  | FLRVLNRDRNYTAPG   | EIVRAYEWAHDMVMP  |
| FARMWELYLAYSEAG  | QTYGVDVVGYDRTQD  | AAIS IARAKGAEIFA  | NIGNANIGFNGR GDA |
| DAEFCGRHTRYSSA   | LYRPLIFALYCLPLN  | RLVGIVTEADIARHL   | IGNIGDRNLGIGNTG  |
| NLGSNGVGVGNIGND  | AVERAGAGVLLRTER  | FGPVVVPPIVLAIN    | LTGAPPYRADSVERL  |
| AIPSIHLGIDPTFDV  | GLLDVQTDSEFWLIG  | TGAFGPVVVPPIPVL   | PALDQVI AKGMAKNP |
| FLRVLNRDRNYTAPG  | AGEVEYVPSEVDYM   | TGIVSALNRPVSTG    | AAPL FVTAEFINNNT |
| VVGDNRLSLSVSARL  | PILHRRRREFKARAA  | ITPVHPGYTATFLET   | TLFQTLT SIAEKVDP |
| RVVKLAAGSKTQTVL  | LFNLWGPAFHERYPN  | LRIGLATAEDIRQWS   | RMELLAKSGKTIVLK  |
| SSGFFNSGAGGVSGF  | MALASLAARGTTGGG  | ATVY MIDTVLMPPAQ  | VLFWLDPYRPHENEL  |
| GQYTYIPLDTPPAPA  | ERYPEWNEG VKGAWV | SGVEGLPPGSALLVV   | RPSYGLAEATVYVAT  |
| LVRGLDTIAATGNIL  | NTRLGLFPFRRGLTF  | GFTIPAAPLPLTIDI   | VIGMGCRLPGGINSP  |
| SMAGSSAMILAAYHP  | YTPFALLALPAHDGR  | VGGNIISGIPTLSTT   | LVL DVPRSGRRSVAV |
| IDGPAPDGYPIINYE  | ATDINAFSVSGQTY   | DKTLHSV KVIPSRGA  | MLEM RTHVETETGIR |
| SFPGFPGFPEFPAIP  | FSTPPITIDRIPLNL  | KVLAAMYQGTIKTWD   | ICGGVETRIEAVPIA  |
| GSVGF GPIAVPSVTI | SGAIGPTWYSVGRIY  | VVISAPQGLE YV VAF | IAADRKILNEIAPDV  |
| STTIGPVSLPIFGFG  | VLAGASLVAVSWAVG  | QPATTVALGRSVCPM   | LSSLGWNL CRIFTDG |
| YVIAGDIPLINIPPT  | TRFLGVRLVKLLYRL  | GLSDLYSKIESLPAS   | ARVLYDFVNNEALPG  |
| AVDGAGTVYVTD FNN | TRINQSFPVTVNWST  | PLRLVYSDGTATGAA   | AAAIAAVEAEYELMW  |
| YDPEGPVGRSVSRW   | WRGDYEWLWGLSGGS  | IYNTSTLPLGTPALV   | ILPPIHLGLTGQANY  |
| LETPSQFFPFTGLNS  | LDLAPKDEKIIYFA   | IAYARKFLDDSVPLS   | TGVLPAAANDVSVLT  |
| GQNAAAIAAVEAEYE  | EFRQAARRLAEAFGP  | RKIPLTLVHAVSPEV   | LFPDLPSPFGPFGFP  |
| TIHYTLTDEAPLLAT  | GTGTPIGDPIEYRSL  | GLGLPPPWPQALPRL   | AIPGFPALPGLPSIP  |
| IYNTSTLPLGTPALV  | VTLAHVVRPFALAQS  | QPGTVTLTFTPADGS   | DAEVLPWDGRNHYL   |
| KNNEFRVAITPAGVA  | AAIFKDTLMSYEWEP  | KLLSSILTYHVIAGQ   | QLNAMKGD LQSSLGA |
| AIMPWEGHNYEDIAI  | PNFAFELAARRTTDD  | KDTKAVNPESTFSRI   | VLLCCSGVATAAPKT  |
| YSLDVPRITILDAH F | IKERYARCLGSAVNP  | TGHQVGD RVGGFSEG  | QPGTPGYAQGQQQTY  |
| DSPAAQVAVRWAARD  | SAGTVGLIKAILSLR  | VERQIHEIVRAYEWA   | VLAIGSPLGLEGTVT  |
| VIWTRLFGVRLVKLL  | YLQFRGEFTPKTQLT  | KLLAGSTTSTVLPFT   | VTAGQAE LTAQVRV  |
| TVGLIKAILSLRHGV  | RSLARVY GAGTPCAL | VGSWIGSSAGLMVAA   | TLPVQRHPRSLFPEF  |

|                   |                  |                  |                  |
|-------------------|------------------|------------------|------------------|
| SGIAMAVVGGALLYL   | SPVTLAETGSTLLYP  | MKEGRYEVRAELPGV  | SEAI AASYDAGVLTV |
| EADLDVLDHEHGTVLL  | HRATLGQPLDWFCFL  | PIAHSTVLVAPVSPS  | VVELDGDDEMTRVIWK |
| LNLGSLSGIYNTST    | NITDELIDRDWSPKV  | VYAPKSALGHVSVGAV | DPVDAKALGQSVCP   |
| VQFQSGGNNSPAVYL   | TGTWLLFLGADDSLY  | PIPLKIDVSGGLPAF  | PSVMADVASGNLPA   |
| ADVLTKNEDVIVREL   | VANNTLWVYCGNGT   | ALAVAVSPPAAAGDL  | ARMLMDAAIFKDTLI  |
| NNLGIGLTGDNQTGIG  | TGLFVPQAVTPWPNG  | QPTPAWTELAQAQR   | ALNGMPAGLLSGMAL  |
| AVLPPEVNSARIFAG   | ACRPFDRDRDGFVFG  | EKIFGPTRDWECYCG  | KPPPAIKIDPPPPQ   |
| RSDESGTTDNFQRYL   | QLVRSFGVYFDETID  | PPLGSPPKTTVTFS   | PLLLAAAGCGSKPPS  |
| LVRITRELAEFEGEL   | AAAAPYAGWLGSVAA  | TDLGVPFTEPASVLA  | TDLPPTPISVIFRS   |
| FLALGAGFEDIGIKT   | FVRSEGCAMVLLKRL  | VLNARFALNAANARW  | YRASASNGSDDASAH  |
| GPFGLGVVNISGIE    | STGTTVLPFNGLYQP  | APWGIAVDEAGTVYV  | RDLLSRMPDLRCLL   |
| SDFVKKFEETFEVTA   | QGNSDRRAPKAVKEY  | GLNVGITIPEFPIHW  | GSVSSGLLRHAHCPV  |
| ANYGFAVPDIPAI     | RCGSPA WDLPTVFGP | GTAVRAFMQAAIGPG  | TTVLPFNGLYQPQGL  |
| GQPVLAI GSPLGLEG  | ATTVFGGKYVSLTTP  | VVWGLTVGSGWIGSSA | SFAKLEPLEVPGLL   |
| AGRLLGSVPANVSRR   | RLTQLPDTNIIKLPN  | YRPMAPNFDDSI AFL | SPIEDFSGSMSLSFS  |
| IATFAAPVALAAYPI   | QLMSGYFADTDGIPP  | GLLPPEVNSSRMYSG  | VRLHEGQTTMTVPGG  |
| ISASVPQLVAAIKEL   | FRLPLL FVNALGDNW | QIADRMFLAEKTVKN  | PVETDDIDHFGNRRL  |
| LKACIKAAAADR VVFI | ILPTIPLNIHQTFSL  | NQSFPVTVNWSTPAV  | VSADYITVMHDNGTR  |
| ANVSRRAKVDVLIVH   | SGGSGQPSIIDAAIA  | DTRKHRVVALKLISP  | PFLADGTPVDIILNT  |
| GNVGFNGIGDANFGL   | GTGNIGFFNTGTGNW  | RFVEIGKADVYGNTR  | GIGLVAGLIAPPLAV  |
| SGTGNFGVFNSGSYN   | FFNSGTGNFGVFNSG  | NIGLIGLSVYARVN   | LAGALPGIVGGAPNP  |
| HAFGDQYRATNFKVD   | GGQVISEEVGLTLEN  | PQGEQSTGKIYFDVT  | RSVGVPLYLLLGWVA  |
| WSTPAVTIFPNGISI   | EDRAWTEAVIGNRRR  | TQVLVPRSAIDSM LA | TATILHNAGVTALVL  |
| PSMTIGGQTYTIPLD   | VNVFEQACPGQTLNY  | AQLQAVPGAAQYIGL  | PWPTTFGYHEFFHAC  |
| LNAGLGNVGNYNVGL   | DALARRIGRHGLIGF  | LEEFDHQLTRIELRR  | PRDDLIQVARVGLVN  |
| VVLPWDGRNHYLA AV  | AMSNLLGQNA AIAA  | VNMNAQLVGVNSAIA  | LDIANIFAPNLGERL  |
| FNNGALWTGDHHLV    | ALAAGVPVIGLPSNM  | TSAEFTRRRYAEITN  | SPSRKTGELDNRGSQ  |
| IAYARKFLDDSVPLS   | FVLARSLDPSRYEVH  | VKKFEETFEVTA AAP | EHFASLADVLTKNED  |
| TKRRITPKDVIDVRS   | AVVLPGLVGLAGGAA  | FTGLIAIHGLKASDV  | RELTEVQGEVVDIGG  |
| VLAIGSPLGLEGTVT   | PLTPARAVAIVRQIA  | YNTAIVGLGTPALVS  | FADTDGIPPNSALV   |
| DPERQEA VLEDPYIL  | PNPYTYPENLPRVNA  | TPVDIILNTHGVPRR  | WMHLMASDFHAFSAA  |
| GLPSLFGFNLLSFAS   | LLRTERLKSQRVAGA  | RKTGELDNRGSQFYL  | LRGLLTELHRAGAAL  |
| VTLGAAFGGLT TAHT  | AVKVTLGPKGRNVVL  | ILPTIPLNIHQTFSL  | PRSRCPRRSGSSRAP  |
| NIISGIPTLSTTGPV   | FPKYPLNVFATANAI  | VHPGYTATFLETSPQ  | TRRCWTLVSSRSARA  |
| LDIHETMVPIPIVFL   | GPVWVFSGQGSQWAA  | SEEAQLVVVGSRGRG  | LSGSEEDETA WRNGD |
| TAVFTGLTHEDYLVL   | DAAVGHGDRGPVWVF  | FAPNLGERLIIHRDT  | ARLTPSPLGHEERT   |
| VCAVDMPYLTVELIE   | SRYEVHFACDPRYNQ  | LLKQYGPLTPARAVA  | FGGRFVEIGKADVYG  |
| PVSTTGEAGNQNTVL   | RELTEVQGEVVDIGG  | VRVNFEQLMSGYFAD  | QGAAAAAMAAAAAPY  |
| ADGRFVEPRVLVRRK   | ELAEFEGELPRLFVV  | VDTQGAVYVADRGN   | PPITIDRIPLNLGAS  |
| NFEGFLGNVGITIP    | YDRTQDVAVLQLRGA  | GQPVSRLVIRGEHRD  | TGFGGLNSGAGNLGL  |
| ASIFAWTRGLQHRGK   | LRCLILTSYTSDEAM  | ALGRSVCMPMVVAPGG | GTGNIGFFNTGTGNW  |
| LRIARVLYDFVNNEA   | VKTYLKDHDTEGLDI  | DTNRLMVSIGTGLGS  | FANTGTNNLIGLGTG  |
| GTGSTGLFNAGGFTT   | AFQYDGVNDFPKYPL  | LTTYILLPSQDLPLL  | TGIGGLNSGAGNIGL  |
| PYEALGGTRPGLIPG   | EYEQIWAQDVAAMFG  | EQVAAKVVPVVMLE   | GIGLTGDNQSGIGGL  |
| EGWGKSPGFGTTVDF   | SAHIQRTVASCNTR   | YDHPTFAVHDTLFC   | AMMARDTAEAAKWGG  |
| AAANSWVDVFAHWPR   | KNVPANAFVADYLPG  | EYLQVPSPSMGRDIK  | YKTVVVGTGDSSSM   |
| VLNSLTGAAQRAGLE   | HACTAVAAICHYIAM  | EYLVRLHEGQTTMTV  | DRAAQIAGADAKLII  |
| TTSEQHQA TILRRG   | QFTAQIADLDQEYDD  | DGGILTRFGFSIPQL  | LTTLPKFPLPGLPS   |
| FGNTGTNNLIGLGT-G  | CIKAAADR VVFINTG | LLGWVAVWYTATILH  | IIDGLWPKLPDIPI   |
| SGIRTLDDPFVEEFD   | TSTNPIASIFAWTRG  | ANLGRAASVGSLSVP  | LRDELPLGLPATG    |
| DESYKVTGTAPIYEI   | PWILAYEDHNVDAGL  | VEAITPQTLINIRPV  | PYLTVELIEDLARRA  |
| VNKIRGTFKSVAVKA   | VSLPIFGFGGAPGFG  | SGIPTLSTTGPVHAV  | PNAGSRFLLDQAITS  |
| LLASASIGTLGFTIP   | QFEAAGLTYEHLRID  | LVDFGIARAASDPGL  | TKPVSQDTSKPKATS  |
| ARLAGIPYIAIANAY   | ECKDKDMTYAAPLFV  | CAPVFMMAAPGQPLP  | LTNNHVIAAAAKPPL  |

|                  |                  |                   |                  |
|------------------|------------------|-------------------|------------------|
| ISAAQVNYNLPGVSE  | SPSRKTGELDNRSQ   | SSRYGHWVPAVAVGC   | PKTTVTFSDGRTAP   |
| PTISVQIQVAIPLTS  | QVVLNALADLPVTVI  | SDIFLDDVTVSRRHA   | DDAVVRELELPGIDVD |
| SAKVDCGGKTLKAS   | HLIGPPPATVIRLSD  | RLTQLPDTNIIKLPN   | GPFGGAAAPVSAGVGH |
| IHELVNIGPFRIEPI  | NTGGFNPGSINTGWF  | GAVAMSLTVGAGVAS   | EDDRAWTEAVIGNRRR |
| GVLNVGSGISGLYNT  | FNSGTGNIGFFNSGTG | IVGASNSTGMSGGFV   | GGQVISEEVGLTLEN  |
| FWDEDEGEVMRDYRLR | NRVSFAKLREPLEVP  | DSLPTDRPIVYATLG   | AAGTTASPGAASGPK  |
| EVTYRADIYALACVL  | YQPQLAVDGAGTVY   | VGITIEFPIHWTST    | VNVFEQACPGQTLNY  |
| NVTGSVGFPIAVPS   | APNAAPEPVARRQRI  | ELMPTYDLPANHEYL   | AQYIGLVESVAGSCN  |
| TDLPTPISVIFRSO   | LWVYCGNGTPNELGG  | NNQVVLPTDITAPW    | LSFTLTGNPNRPDGG  |
| TIFPNGISIPNNPLA  | IVKDAPIRDWVKLAV  | PIDADGRFVEPRVLV   | ADTAGRLTEPHIVPI  |
| LSLTIPGFTIPGGTL  | GEPKPGNYRYAINNS  | KKIGVIKVVREIVSG   | AVAVDSDRTVYVADR  |
| VDVSEWPGIDWPATQ  | FTDLAQPTPAWTEL   | FGEPSSGFSSMLWGG   | GRHGKNGVIGKILPV  |
| FNTGLANAGSYNTGS  | PIHLGLTGQANYGFA  | PGVLRWQQDHGRHLI   | FGNTTADVFDGRGGPY |
| LPAGHGLNAQTGVYE  | PWPTTFGYHEFFHAC  | CIKAAADR VVFINTEG | LFCTIRNFYDADPLA  |
| GQNSAAIAATQAEYA  | NIGFFNSGTANFGLF  | GPYLQRGVADLVPTA   | FALLALPAHDGRVVL  |
| DTLWQADTDPLPVVF  | GSPLFPDLPSFPGFP  | PVISEHRLVGIVTEA   | TKIDGVGYPVHKPVT  |
| TNDGVSAIEIELED   | RWLVAEAGPFASVYF  | VFLVDDHEVRRGLV    | HGLIGFGESYMAGEW  |
| FGPVVPPPIVLAIN   | RFRGFDNWEGDAATA  | ALPEVGDGEAGSWLL   | PDYLTEEQRVPDNLA  |
| RDATDDQVTIDAAYA  | PFTGLNTPLAVAVDS  | PTDRPIVYATLGTSG   | ESLPASQRDEIIEDL  |
| LDAHIPQLVASQSAF  | AGVNELVRVYVAQKR  | YVIAGDIPLINIPPT   | FHSPSDVIVDASMPA  |
| AAARGAHIRSVTLV   | VLNARFALNAANARW  | DALFTGLIAIHGLKA   | LGAGFEDIGIKTGNE  |
| LVNIGPFRIEPIV    | DHSRDQARRNIAVHY  | NVELDPGQPVSRVLI   | QHVARRPGESPPSII  |
| TAAMADPAADLIGRG  | MAPERFTGDEVTYRA  | MALGKNLLVAIMPWE   | DGKMFIIIGRIKDLI  |
| NRTLLSLMDAWAGPV  | KRKVWAVVGAIAIVL  | DGTRTWRTGRQATTL   | TTTAGGLASPYVVTG  |
| KGLEKIPLLGHLSW   | AEPDYLTTEEQRVPD  | LGWKVSDLKSSTAVI   | ELAEFEGELPRLFV   |
| ILPPIHLGLTGQANY  | HRRRREFKARAAEKP  | AADPEVVFVSGEVRS   | VLNSLTGAAQRAGLE  |
| QGLSCTLPNRDGDV   | RFVEIGKADVYGNTR  | MAAIATFAAPVALAA   | VDVFAHWPRAGQLPV  |
| ATGFTVQDQGLVVAL  | TLPVQRHPRSLFPEF  | VHFQPLPPAVVKLSD   | FVEEFDLPVRIGGHL  |
| LGLPPPWPALPRLF   | GVQQGSHVLEIGTGW  | LYLLGWVAVWYTAT    | NLVNLDPEIDL DVVA |
| IILKPNISASVPQLV  | YAEYQQRSEKVLTEY  | IGTYCPAVIAPLMPN   | FRHHAIHTIPSERFF  |
| VNPVLRQGNDRRAP   | VLKPEVPLDDGVID   | AVQTAAQNGVRAMSS   | LRVLDEIAPDLVVG   |
| PGFTIPTGPIHGLP   | WPRAQGLPVSAIAWG  | LAPDTVPLAGVVLAG   | RLADAFGRDRVGFQ   |
| VNARGGPGGAPGCWQ  | RFPLPDVIWTRLFGV  | PAGIKIEASDISVAA   | VKRADLVIGAVLVPG  |
| PWEGHNYEDAIIASN  | FSNGILWRGNFEGFLF | RFVPTCSQYAVDALT   | SAAVSFGQVTSGLTA  |
| FRLVFLTGPKQGEDD  | NRPDGGILTRFGFSI  | KRLPDALRDGNRIFA   | TRINQSFVTVNWST   |
| VDTLNSGQYTVFAPT  | NIGFFNSGTGNFGVF  | VSTLIVEPVMGPAAA   | TIFPNGISIPNNPLA  |
| TCELSRVEDVLGLP   | TSAEFTRRRRYAEITN | GTIRNLLGGTIFREP   | APLPLTIDIDGQIDG  |
| RNLLGGTIFREPIVI  | GSIIYVKPKMHGPAE  | IKIEASDISVAARIL   | STINGISMSEVVPID  |
| MKFARSGAAVSLAA   | MLKGFAPAAAAQAVQ  | AINNALGGNRPAVYA   | FGNSGLGAALGIGNI  |
| PLLGNPLADLIQPD   | VGITIEFPIHWTST   | FRGRWLDPRHAGPAT   | SGIAMAVVGGALLYL  |
| RMAPLVDRQNAGDVA  | ALVHGMFVALPAATA  | RAQGACTIONVHPLL   | TTTLVEHVMVILGQR  |
| AEPDTADRLVSAATA  | LLVVGTVGLSTIAGR  | MSAQAFHQGESSAAF   | KDQTSDEVTVETTSV  |
| LPLPNIPLEAARF    | RTDLLSTLPQRVAVR  | VDAHGAMIRAQAASL   | AGCQTYKWETFLTSE  |
| LCKTTSNFIWQQLL   | SDRRAPKAVKEYARK  | LNGHHPGDVISVTWQ   | VVFPVQVQELSKQGT  |
| QIRQEIENSDDYDR   | LVTASDFAYLVDFGI  | LVRGLDTIAATGNIL   | TNDGVIFFFNPGELL  |
| DLLGADPELDVVGEA  | LGAGFEDIGIKTGNE  | DVFDGRGGPYLQRGVA  | AASAAPSIPAANMPP  |
| NSGVDISGMFNVSTL  | PRGPLAAASAAIANR  | LLGSVPANVSRRAKV   | RWSWLLSVLAAVGLG  |
| GLPLSLTIPGFTIPG  | VLANGDEVQIGKFR   | DRVGGFSEGGCWRTF   | HQAIVRDVLAAAGDFW |
| TFEVTAAAPVAVAAA  | LSDYVYVPLIDLEM   | DAMARLGAIKREVTS   | LLTVDMDVQVTPMPV  |
| SGMFNVSTLGSAPAV  | DYSALYPAGRLVDAP  | GGVHTANATVYMIDT   | SKVSTVKDLLPLEK   |
| LTGAPPYRADSVERL  | NIGLIGLSVYARVN   | SRDMASTFTIVAIGT   | PVKVTRSALQNAASI  |
| AGAGTGPPTPGAARW  | FGNSGLGALPGIGNI  | EYELMWAADVAAMAG   | LLGLLSEGLTNKQIA  |
| SSQLLANWLRHGVIT  | PFLADGTPVDIILNT  | DPITIFPGGFTIDPL   | GNSSLGIIVGIDDSP  |
| PQLGFTLSGATPADA  | YEDIVGLERLYAENP  | DIVIPAFGGGTAIPI   | EDGEVMRDYRLRVSD  |



|                 |                 |                  |                  |
|-----------------|-----------------|------------------|------------------|
| LGALQAGRIAVPLSV | VAANLLGQNAPAIAA | ALVSWLPHYHDMGLV  | GPWHRGGWDPIEGL   |
| WQADTDPLPVVFPIV | MFRELVGLPAGSPEF | LAGVFGGAASCAAPI  | GGTDSLPLPNIPLL   |
| VDISGMFNVSTLGSA | GIGLVAGLIAPPLAV | LQRGVADLVPTATLL  | ALSGLGLPPPWPAL   |
| RMELLAKSGETIVLK | PYLVMDTGASLAPYN | SAGTVGLIKAILSLR  | EVYEAEDTRKHRVVA  |
| GKPTSTNPIASIFAW | SQESGVIEEVSADYI | GPKGRNVVLEKKWGA  | PFGFIETPYRKVVVDG |
| PLRLVYSDGTATGAA | LGLFPFRRGLTFYYL | TKDGSHYKITGTATG  | CDFYEEQMQDAFETG  |
| PTPIGELDVIALYIA | IAKLEPVIAAESGFS | LPPAANDVSVLTAAR  | VKTYLKDHDTEGLDI  |
| PTTYDHPTFAVHDTL | VYVTEHNTNQVVKLL | APIGLELNGGVGPI   | LSVPQGGVTDERSDS  |
| SYNTGSFNAGDTNTG | PLGFQVPGSIDAITL | MKAIADIEAYPQWIS  | DSSPVAILTSSAVD   |
| EIVRAYEWAHHDMPV | IFAVVRGTATNQDGR | MPPGSVEQVAAKVVP  | LRAAGADIVVECGNI  |
| NFIWQQLLLGEGIP  | VHKPVTAGWNGYGDF | CLFSSGAALLGSPGQ  | IMGASITSDGFHMVA  |
| SFAKLREPLEVPGLL | RQAVPLVRSEAPLVG | TLQGASVTVTGQGNS  | SGVDAEITTTAGPQL  |
| PGGLNIPQNAIPLTI | PSIPLGFAAIGHIP  | LSDYPYVVPLIDLEM  | LLANWLRHGVITSAD  |
| GEVDEEAATALDNDG | PVWDVEPWDRWLRDF | LPPEINSARMYAGPG  | PITISPITLFPANFN  |
| AENRAELMILIATNL | ITLFPGGTLFPANSL | SLVAHMKPGAVLVDI  | VPDIPPAIHIDFDG   |
| VSLTTPKNPTKRRIT | PGNVNTGWFNAGHTN | VGFGNMGVGNIGFGN  | PPIPVLAINAHLTGN  |
| MNFAVLPPEVNSARI | IRLDYYDLGIEHRDA | ASRANEYADVPEMFR  |                  |
| MNFPVLPPEINSVLM | INAFSVGSGQTYGVD | LLPFGGRFVEIGKAD  |                  |
| SYLRNFLAAPPQRA  | QGLAVDGAGTVYVTD | MAELAPDTVPLAGVV  |                  |
| VGSYNLGFANVGDVN | PDALRDGNRIFAVVR | VSRRAKVDVLIVHTT  |                  |
| TLAETGSTLLYPLFN | LYPLFNLWGPAFHER | SRCGSTGDRVVISAP  |                  |
| GLGNVGNYNVGLGNV | LADLPVTVIAATAGR | KYGGTEIKYNGEAYL  |                  |
| RLLDVAGVQQGSHVL | FPGGLTFPANSLLNL | FAYLVDFGIARAASD  |                  |
| GSDFVSFAVPTIMGE | SPAVYLLDGLRAQDD | KRLPMSTRLGIRLVI  |                  |
| DKDGTAFRLVLRDR  | YIGISFLDQASQRGL | YQAGKPTSTNPIASI  |                  |
| QVARVGLVNAAVRFD | VSTANATVYMIDSVL | KVDQPGTVTLTFTPA  |                  |
| AITRVVVRDQPARQL | SWLPHYHDMGLVIGI | DPDHDGMRVQVRRPG  |                  |
| HVLEIGTGWGELCIR | FLGGFAGLPSLGFNG | AGYTGTTQSLGADIA  |                  |
| EYLGPNLWSPAGKPP | TQQALAAGVPVIGLP | ARLGAIKREVTSALS  |                  |
| VIRLSDYPYVVPLID | LRIGLATAEDIRQWS | AMEDGYRVFADVSPH  |                  |
| LSGKLNPDVNLVDTL | KLLYRLERPLLALQ  | GGKTKLKASGSTAQA  |                  |
| DVSGGLPAFTLFPGG | TGSIALAITNTARPW | GAFTIPQIDIPALNP  |                  |
| GLSDLYSKIESLPAS | DLCDYRDVDGQYDSV | GLFGLNVGITIPEFP  |                  |
| SNVQLNPFVNLKQ   | RGGPGGAPGCWQPIT | RAYPQCPLLLHAVDQ  |                  |
| MLPRSPIVRIVSDT  | EQDWGVAITLWSQ   | LTALTNAGIAYDQPA  |                  |
| NTGGFNPGSTNTGWF | RLADAFGRDRVGFQ  | RSLVRIVGVVATTL   |                  |
| IKDLAGNVTLQLGNL | EFFHACTAVAAICHY | TGPYSMITQQPLGGK  |                  |
| GGQGGTPRAVGRVV  | LKSLEGTYRLAPKGS | AGDIPLINIPPTPGI  |                  |
| GFGNATATPSSGFFN | KTFEIPEDGVANIVD | LFSRVEDVLGLPQNT  |                  |
| VVVPPIPVLAINAHL | FNSGTGNIGFFNTGT | ATLFDPREQPVCDGA  |                  |
| PIQILPTIPLNIHQT | IVLGGYSQGATVIDL | MEDRATLRISSQLLA  |                  |
| LAALGDVYADAAPDL | GFAGLPSLGFGNLLS | ALGGTRPGLIPGVIP  |                  |
| RLVGIVTEADIARHL | ILTTSSAVDDVVQHV | LHFPGFPTIPTGPIHI |                  |
| SFYRPTQPGSYPIVL | PWDRWLRDFFGPAAT | AVLPPEVNSARIFAG  |                  |
| AAGAKERQRLATSLR | GVADLVPTATLLDTY | SLGFGNLLSFASLPT  |                  |
| LPLGLGLSGGTPPFD | GQNAPAIAAAEAYE  | SYLRNFLAAPPQRA   |                  |
| DAASIMAIVADIERY | RPSKTFNAALEAVQG | ANYGFAVPDIPAI    |                  |
| IHIPSIPLGFAAIGH | GFTLSGATPADAYPT | DTVGVRIDRKRQPV   |                  |
| HSMGESAAAVVAGAL | VLRQGNDRRAPKAV  | SLERMAPLVDRQAG   |                  |
| YVAADAAAASYTGF  | NIGDANFGFGNSGLA | VRSEAPLVGTGMELR  |                  |
| AGDKKIGVIKVVREI | SSILTYHVIAGQASP | NGERAGHAITRAIQL  |                  |
| EVAGAGSGFANFGSL | WGPSSDPAWERNDPT | VGHAALVGALVPHS   |                  |
| IPIQAMAIAGQIRS  | AWRNGDWYVARTLPS | PLLEYAARFITPVHP  |                  |
| DSSDCGTIRVGSFRG | LGDVYADAAPDLDFD | LGAEITRDIPNISD   |                  |

|                  |                  |                  |
|------------------|------------------|------------------|
| FASVYFDDSHDTLDA  | GALWTGDHHGLVGFS  | SFVRTVSLPVGADED  |
| HTLSIDSGGSDDDDA  | TTVALGRSVCPMVVA  | VFGGAASCAAPIQAD  |
| LIKDMLLPLYDLRL   | TATILHNAGVTALVL  | LVEHMOVILGQRCAP  |
| GQYTVFAPTNAAFSK  | VPPAGNKRKVVAVVG  | RIPLDVAEGDTVIYS  |
| GNPLADLIQPDRLVL  | PQPSQLRPGRVPPAL  | TCVGEHETLTAAAQY  |
| PIPLKIDVSGGLPAF  | QLLASEPVFAATIAK  | ITLFPAQNFNTTFPV  |
| AGTVNIGASDAYLSE  | LSLSVSARLAGIPYI  | HQTLQGADLTVIGAR  |
| PIFGFGGAPFGNDT   | GLFNSGSYNTGIGNSG | LMDAAIFKDTLIMSY  |
| VGNVGLSTIAGRLLG  | AVAVDSDRTVYVADR  | GPYQLLRLGRGGMG   |
| GAFTIPQIDIPALNP  | HTHDGTRTWRTGRQA  | ECKDKDMTYAAPLFV  |
| LFNAGGFITGLANAG  | IGLELNGGVGPITVL  | SGVLAAGTALTQSPI  |
| FVALPAATADAYATT  | IPEDGGVVLGMYNFK  | NADGELYVIAGDIPL  |
| LELSDFVKKFEETFE  | DLPANHEYLGPVLWS  | DLEKIIYFAAYVITS  |
| PKDVIDVRSVTTEIN  | WGGAIAGILLKMCWP  | GSAVNPVLRQNSDR   |
| GLAAGLAGVGNIGLG  | ATIATFEMRYLQSLP  | DWYSPACGKAGCQTY  |
| VLLKRLPDALRDGNR  | GINLSRNESASFEDL  | AMAVVGGALLYLTIM  |
| SGVEGLPPGSALLVV  | RTAHQDVSPFGLFP   | RNILGGTIFREPIVI  |
| NGMSRDMASTFTIVA  | LNLGAANIGDVNLGF  | RRATIEQLLTIPLAK  |
| GNLGNLNLGGGNLGG  | PLGFAAIGHIGPISI  | AHAGDMAGYAGTLQS  |
| PLLVPLRAIPLLGNP  | AAVDAADKVLGYRNW  | VPLRAIPLLGNPLAD  |
| RLVSERLLTLGWQQR  | PGVLRWQQDHGRHLI  | GSLALTLPTVTIPTI  |
| VLNFGSGVSGLYNTG  | ASAFEATLAATVSPA  | IPATPGFGNTTAPS   |
| LLSFASLPTVGQVTA  | VAAICHYIAMWFVVF  | VYVTDTDNNRVVKLE  |
| PFDRDRDGFVFGEGG  | AETTWKLLLDQRSGI  | SSMRAVDRAAQIAGA  |
| LAERLAGWQERYPNV  | VKRADLVIGAVLVPG  | LSGIYNTSTLPLGTP  |
| EPPERHVWQGDVGTS  | HADPCSDIAVVFARG  | YPTVDYAFQYDGVND  |
| DGKMFIIGRIKDLI   | GLLPSTQAIIDITGQ  | DGVGALLRYAATNRL  |
| GWFNAGHTNTGGFNT  | RIFTDGDHTLYADVP  | AKAKLEAAGATVTVK  |
| PVAITTESVGKTIAG  | LAPKGSGETVYELA   | HQVRRVPVISEHRLV  |
| QTSPANVVGTRQTLQ  | TRRCWTLVSSRSARA  | GTFARPMTELVTKA   |
| NISVPDSSVPIIIVP  | DPRAPSLFIHRPDAL  | LLRTERLKSQRVAGA  |
| TSGSVHCGGKELHS   | RTLDDPFVEEFDLPV  | EDRQSLSWTLESSSL  |
| CVLGECLTGAPPYRA  | SYDAGVLTVRVAGAY  | HVTSEAIAASYDAGV  |
| LALNISVPDSSVPII  | IQRTVASCNTRIVL   | MTLDRARNVRMELLA  |
| IDSDRWPAVAKVPRG  | TLPQRVAVRVSQSHA  | PCSDIAVVFARGTHQ  |
| AANDVSVLTAARFTA  | FLNNETDFAGSDVPL  | RDLWPAPYLVMGTGA  |
| LAIPGTNWIGQAAEA  | LWSPAGKPPTWWDSL  | SQGATVIDLSTSAMP  |
| KLLSSILTYHVIAGQ  | PDVNLVDTLNGGEYT  | LGLPPPWPALPRLF   |
| GRHGKNGVIGKILPV  | FEETFVTAAPVAV    | TSDEVTVETTSVFRA  |
| AEKVRNLPAGHGLNA  | MAQLAAGNEVVVFGT  | SINFADVLIAFGRFP  |
| IIPDTTILPPIHLGL  | MAPNFDDSI AFLAAQ | GMERRTQAAVFATEL  |
| PPTPGIGNTTVPSS   | DLASGVVQPVSSPDV  | VVSQLVRSRPGVYFDE |
| ELGRLTQLPDTNIIK  | AVGSAKAGLTTLAYT  | CSKYPDATTGTAVRA  |
| KYIFPGGLLPSTQAI  | QGSVLEIGTGWGEL   | QPLPHGLRGLLTELH  |
| LFLHSGLIALPPDLA  | VQPVSSPDVLTYYIL  | CWTLVSSRSARASSR  |
| TVDPITLTIPLGLSLD | RDRNYTAPGGGQFTL  | HVETETGIRLTPKVI  |
| MLEMRTHVETETGIR  | PFDLPTVVIDRIPVE  | DPAFTFMDYEQDWDG  |
| EMTAVQRSFNRTLIS  | ETMTYSCAMFTDLA   | TRQTLQGASVTVTGQ  |
| PLTIDIDGQIDGFST  | SFVRTVSLPVGADED  | LEVPLPPGVLRWQQD  |
| GSLALTLPTVTIPTI  | LKLISQYSDNAVFR   | SDTVRDLIARWEQRD  |
| ARVLYDFVNNEALPG  | DVKRFRGFDNWEQDA  | HTIPSERFFGNLTQG  |
| LNLGDPTLAKIFNGS  | PFGLFPDVDWAEVAA  | VGSAQPIVIPTPIGE  |
| VNLKLQFLHDAFPNE  | QPHDPAFTFMDYEQD  | LAPKGSGETVYELA   |
| AIPIGLELNGGVGPI  | ARRIGRHGLIGFGES  | RVVGSAPAASLGIST  |

GPITVDPITLTIPGL  
IIDGLWPPKLPDIPI  
PLSLALNISVPDSSV  
IHIGLPLSLTIPGFT  
RDYLTDLFPILELGT  
TPALNIHQIPLGFQV  
SWTLESSLLKSLEG  
VPPLLHFNRLPDELS  
PYLTVELIEDLARRA  
DTTILPPIHLGLTGQ  
LAQALVREGLRNAAA  
VTIPALTAARAVLDM  
TGPIHIGLPLSLTIP

YTYPENLPRVNARGG  
FRGRWLDPRHAGPAT  
YTLTDEAPLLATYAF  
FFNPGELLPEAAGP  
AGNFNTGVANPGSYN  
DTVGVRIKRRRQPV  
VHFQPLPPAVVKLSD  
GLGLPPPWPALPRL  
ALSGLGLPPPWPAL  
STGLFNAGSFNTGLA  
LDIANIFAPNLGERL  
FGDATGFTVQDQQLV  
SSGAALLGSPGQAY  
KIFNGTITVWNDPQI

SVASGRIAHTLGLHG  
VDISGMFNVSTLGSAA  
LLNQASSPMVGTLSG  
VLLKRLPDALRDGNR  
PLLVPLRAIPLLGNP  
QEAGNFERISGDLKT  
CAQYAAQNPTGPGSV  
LKVVEQASLRAGPPT  
RTGRQATLLALLAG  
DSVMHPQQAPVLVG  
LQELLTIKSDDTVGR  
HIELAAPVTHIWYFK  
FAEPAGIKIEASDIS  
LPLNPIPLEYAARF
