# Supplementary material
Source: PubMed Central journal article supplement (PMC2812096)
Supplement: supp_17_1_168__2.pdf [file supp_17_1_168__2.pdf]

**Supplementary Table S2.** List of peptides that bound MHC class II monomers and served as IgG epitopes in serum from patients with acute pulmonary *Mtb* ( $n=35/35$ ). *These epitopes were not recognized in serum obtained from 34 healthy subjects ( $n=34$ ).*

| Protein ID                                                   | Peptide /-HLA- DR1 | HLA-DR2          | HLA-DR4          |
|--------------------------------------------------------------|--------------------|------------------|------------------|
| 10 KDA CULTURE FILTRATE ANTIGEN ESXB CAA17966                |                    |                  | AAGTAAQAAVVRFQE  |
| 10 KDA CULTURE FILTRATE ANTIGEN ESXB CAA17966                |                    |                  | GSLQGQWRGAAGTAA  |
| 10 KDA CULTURE FILTRATE ANTIGEN ESXB CAA17966                |                    |                  | QVESTAGSLQGQWRG  |
| 3-OXOACYL-[ACYL-CARRIER PROTEIN] SYNTHASE 2<br>KASB CAA94642 |                    |                  | PEVDNRLMVSIGTG   |
| 3-OXOACYL-[ACYL-CARRIER PROTEIN] SYNTHASE 2<br>KASB CAA94642 |                    |                  | STNNDPAGACRPFD   |
| 3-OXOACYL-[ACYL-CARRIER PROTEIN] SYNTHASE 2<br>KASB CAA94642 | VVAGEPRPGNYRYAI    |                  | VVAGEPRPGNYRYAI  |
| 60 kDa chaperonin 2 P0A521                                   | IRGTFKSVAVKAPGF    | IRGTFKSVAVKAPGF  | IRGTFKSVAVKAPGF  |
| 60 kDa chaperonin 2 P0A521                                   |                    |                  | LENADLSLLGKARKV  |
| 60 kDa chaperonin 2 P0A521                                   |                    |                  | LNALADAVKVTLGPK  |
| ALTERNATE RNA POLYMERASE SIGMA FACTOR SIGF<br>CAB07069       |                    |                  | RLLAKSLARLRDQLE  |
| BIOTINYLATED PROTEIN TB7.3 CAB08316                          |                    |                  | VASVLEVVVNEGDQI  |
| CELL SURFACE LIPOPROTEIN MPT83 CAA98350                      |                    |                  | HQTLQGADLTVIGAR  |
| CELL SURFACE LIPOPROTEIN MPT83 CAA98350                      |                    |                  | LQGADLTVIGARDDL  |
| CELL SURFACE LIPOPROTEIN MPT83 CAA98350                      | PTNAAFDKLPAATID    |                  |                  |
| CONSERVED HYPOTHETICAL PROTEIN CAB06237                      |                    |                  | EFFAIPGFPALPLP   |
| CONSERVED HYPOTHETICAL PROTEIN CAB06237                      |                    |                  | LPTVGQVTATMGQLQ  |
| CONSERVED HYPOTHETICAL PROTEIN CAB08634                      |                    |                  | AADPEVVVFSGEVRS  |
| CONSERVED HYPOTHETICAL PROTEIN CAB08634                      | DGVGALLRYAATNRL    | DGVGALLRYAATNRL  | DGVGALLRYAATNRL  |
| CONSERVED HYPOTHETICAL PROTEIN CFP17 CAB01474                | EVQIGKFRVLVLTGP    | EVQIGKFRVLVLTGP  | EVQIGKFRVLVLTGP  |
| CONSERVED HYPOTHETICAL PROTEIN CFP17 CAB01474                |                    |                  | KDQTSDEVTVETTSV  |
| CONSERVED HYPOTHETICAL PROTEIN CFP17 CAB01474                | NGDEVQIGKFRVLVFL   | NGDEVQIGKFRVLVFL | NGDEVQIGKFRVLVFL |
| CONSERVED HYPOTHETICAL PROTEIN CFP17 CAB01474                |                    |                  | PNAGSRFLLDQAITS  |
| CONSERVED HYPOTHETICAL PROTEIN TB16.3CAD97060                |                    |                  | VTYELAVDLAVPMIG  |
| CONSERVED HYPOTHETICAL PROTEIN TB18.5CAD93033                | VKGAWVLARYDDGRP    | VKGAWVLARYDDGRP  | VKGAWVLARYDDGRP  |

|                                                        |                 |                 |                  |
|--------------------------------------------------------|-----------------|-----------------|------------------|
| ESAT-6 LIKE PROTEIN ESXQ CAA16102                      |                 |                 | DIASERTAPSRACQG  |
| ESAT-6 LIKE PROTEIN ESXQ CAA16102                      | DSSDCGTIRVGSFRG |                 | DSSDCGTIRVGSFRG  |
| ESAT-6 LIKE PROTEIN ESXQ CAA16102                      |                 |                 | LERPVGSSDCGTIR   |
| ESAT-6 LIKE PROTEIN ESXQ CAA16102                      |                 |                 | LGADIASERTAPTRA  |
| HEAT SHOCK PROTEIN HSP CAA17343                        |                 | LTVRVAGAYKAPAET | LTVRVAGAYKAPAET  |
| HEAT SHOCK PROTEIN HSP CAA17343                        |                 |                 | SEAI AASYDAGVLTV |
| HYPOTHETICAL PROTEIN RV2623 NP_217139                  |                 |                 | RKIPLTLVHAVSPEV  |
| HYPOTHETICAL PROTEIN RV2623 NP_217139                  |                 |                 | VRDQPARQLVQRSEE  |
| HYPOTHETICAL PROTEIN RV2626C NP_217142                 |                 |                 | PVISEHRLVGIVTEA  |
| IMMUNOGENIC PROTEIN MPT63 CAB06500                     |                 |                 | SSTAVIPGYPVAGQV  |
| IMMUNOGENIC PROTEIN MPT63 CAB06500                     |                 |                 | VNAIRGSVTPAVSQF  |
| IMMUNOGENIC PROTEIN MPT64 CAA98382                     |                 |                 | INISLPSYYPDQKSL  |
| IMMUNOGENIC PROTEIN MPT64 CAA98382                     |                 |                 | IQMSDPAYNINISLP  |
| IMMUNOGENIC PROTEIN MPT64 CAA98382                     |                 |                 | TQVLVPRSAIDSMILA |
| IRON-REGULATED CONSERVED HYPOTHETICAL PROTEIN CAB08889 |                 |                 | DRAAQIAGADAKLII  |
| IRON-REGULATED CONSERVED HYPOTHETICAL PROTEIN CAB08889 |                 |                 | MSAYKTVVVVGTDGSD |
| IRON-REGULATED CONSERVED HYPOTHETICAL PROTEIN CAB08889 |                 |                 | RPIVGAPVDALVNLA  |
| IRON-REGULATED CONSERVED HYPOTHETICAL PROTEIN CAB08889 |                 |                 | SSMRAVDRAAQIAGA  |
| IRON-REGULATED CONSERVED HYPOTHETICAL PROTEIN CAB08889 |                 |                 | VGLSTIAGRLLGSVP  |
| LIPOPROTEIN LPQH PRECURSOR P0A5J0                      |                 |                 | AAGTTASPGAASGPK  |
| LOW MOLECULAR WEIGHT T-CELL ANTIGEN TB8.4 NP_215690    |                 |                 | AMAAQLQAVPGAAQY  |
| LOW MOLECULAR WEIGHT T-CELL ANTIGEN TB8.4 NP_215690    |                 | AMSLTVGAGVASADP |                  |
| MAJOR SECRETED IMMUNOGENIC PROTEIN CAA98373            |                 | ALAVAVSPPAAAGDL | ALAVAVSPPAAAGDL  |
| MAJOR SECRETED IMMUNOGENIC PROTEIN CAA98373            | QTSPANVVGTRQTLQ |                 |                  |
| MCE-FAMILY PROTEIN MCE1AYP_177701                      |                 |                 | DSALLAAAGFGNTTA  |
| MCE-FAMILY PROTEIN MCE1AYP_177701                      |                 |                 | GPYLQRGVADLVPTA  |
| MCE-FAMILY PROTEIN MCE1AYP_177701                      |                 | LVAGLIAPPLAVAAN |                  |
| MCE-FAMILY PROTEIN MCE1AYP_177701                      | RGGPGGAPGCWQPIT | RGGPGGAPGCWQPIT | RGGPGGAPGCWQPIT  |
| MCE-FAMILY PROTEIN MCE1AYP_177701                      | TKRRITPKDVIDVRS |                 | TKRRITPKDVIDVRS  |

|                                                           |                 |                 |                 |
|-----------------------------------------------------------|-----------------|-----------------|-----------------|
| MTB48 AAK31576                                            | GEVDEEAATALDNDG |                 |                 |
| MTB48 AAK31576                                            |                 |                 | LVLSADNMREYLAAG |
| MTB48 AAK31576                                            |                 |                 | YQQRSEKVLTEYNNK |
| MTB81 (publication)                                       | FLRVLNRDRNYTAPG | FLRVLNRDRNYTAPG | FLRVLNRDRNYTAPG |
| MTB81 (publication)                                       | PILHRRRREFKARAA | PILHRRRREFKARAA | PILHRRRREFKARAA |
| MTB81 (publication)                                       |                 |                 | SADVRASLERMAPLV |
| MTB81 (publication)                                       |                 |                 | SGVDAEITTTAGPQL |
| MYCOBACTERIUM BOVIS ACYL-COA SYNTHASE GENE U75685         |                 |                 | DAMARLGAIKREVTS |
| MYCOBACTERIUM BOVIS ACYL-COA SYNTHASE GENE U75685         |                 |                 | QEITRGRCAAISVPG |
| MYCOBACTERIUM BOVIS ACYL-COA SYNTHASE GENE U75685         | WDGVAITLTWSQLYR | WDGVAITLTWSQLYR | WDGVAITLTWSQLYR |
| MYCOBACTERIUM BOVIS MYCOCEROSIC ACID SYNTHASE GENE M95808 |                 |                 | CLFSSGAALLGSPGQ |
| MYCOBACTERIUM BOVIS MYCOCEROSIC ACID SYNTHASE GENE M95808 | EFEGELPRLFVVTRQ | EFEGELPRLFVVTRQ | EFEGELPRLFVVTRQ |
| MYCOBACTERIUM BOVIS MYCOCEROSIC ACID SYNTHASE GENE M95808 | EIGKADVYGNTRLGL | EIGKADVYGNTRLGL | EIGKADVYGNTRLGL |
| MYCOBACTERIUM BOVIS MYCOCEROSIC ACID SYNTHASE GENE M95808 |                 |                 | GLREVADGDALYDAA |
| MYCOBACTERIUM BOVIS MYCOCEROSIC ACID SYNTHASE GENE M95808 | GYGVDIVLNSLTGAA |                 | GYGVDIVLNSLTGAA |
| MYCOBACTERIUM BOVIS MYCOCEROSIC ACID SYNTHASE GENE M95808 | IEYRSLARVYGAGTP | IEYRSLARVYGAGTP | IEYRSLARVYGAGTP |
| MYCOBACTERIUM BOVIS MYCOCEROSIC ACID SYNTHASE GENE M95808 | KADVYGNTRLGLFPF | KADVYGNTRLGLFPF | KADVYGNTRLGLFPF |
| MYCOBACTERIUM BOVIS MYCOCEROSIC ACID SYNTHASE GENE M95808 | SAGTVGLIKAILSLR | SAGTVGLIKAILSLR | SAGTVGLIKAILSLR |
| MYCOBACTERIUM BOVIS MYCOCEROSIC ACID SYNTHASE GENE M95808 |                 |                 | VLSWLSDHQVHNVA  |
| MYCOBACTERIUM BOVIS MYCOCEROSIC ACID SYNTHASE GENE M95808 |                 |                 | VRDLIARWEQRDVMA |
| MYCOBACTERIUM BOVIS MYCOCEROSIC ACID SYNTHASE GENE M95808 | VTLGAAFGGLTTAHT |                 |                 |
| PE FAMILY PROTEIN CAE55335                                |                 |                 | APTTGVLPPAANDVS |
| PE FAMILY PROTEIN CAE55335                                |                 |                 | AVCAPTTGVLPPAAN |
| PE FAMILY PROTEIN CAE55335                                | GTAVSARNTAVCAPT |                 | GTAVSARNTAVCAPT |
| PE FAMILY PROTEIN CAE55335                                |                 |                 | LPPAANDVSVLTAAR |
| PE FAMILY PROTEIN CAE55335                                |                 |                 | TGVLPPAANDVSVLT |

|                                                              |                 |                  |                 |
|--------------------------------------------------------------|-----------------|------------------|-----------------|
| PERIPLASMIC PHOSPHATE-BINDING LIPOPROTEIN<br>PSTS1 YP_177770 |                 |                  | GKSPGFGTTVDFPAV |
| PERIPLASMIC PHOSPHATE-BINDING LIPOPROTEIN<br>PSTS1 YP_177770 |                 |                  | GVNLPGTAVVPLHRS |
| PERIPLASMIC PHOSPHATE-BINDING LIPOPROTEIN<br>PSTS1 YP_177770 | IDGPAPDGYPIINYE |                  |                 |
| PERIPLASMIC PHOSPHATE-BINDING LIPOPROTEIN<br>PSTS1 YP_177770 |                 |                  | LDQASQRGLGEAQLG |
| PERIPLASMIC PHOSPHATE-BINDING LIPOPROTEIN<br>PSTS2 YP_177769 | AAIGPGQEGLDQYGS |                  |                 |
| PERIPLASMIC PHOSPHATE-BINDING LIPOPROTEIN<br>PSTS2 YP_177769 | MKFARSGAAVSLAA  |                  |                 |
| PERIPLASMIC PHOSPHATE-BINDING LIPOPROTEIN<br>PSTS2 YP_177769 | PVAITTESVGKTIAG |                  |                 |
| PERIPLASMIC PHOSPHATE-BINDING LIPOPROTEIN<br>PSTS2 YP_177769 |                 | QEGLDQYGS IPLPKS |                 |
| PERIPLASMIC PHOSPHATE-BINDING LIPOPROTEIN<br>PSTS2 YP_177769 |                 |                  | SALLQTTDGSITYNE |
| PERIPLASMIC PHOSPHATE-BINDING LIPOPROTEIN<br>PSTS3 YP_177768 | FTLPGERIHVVFRSD | FTLPGERIHVVFRSD  | FTLPGERIHVVFRSD |
| PERIPLASMIC PHOSPHATE-BINDING LIPOPROTEIN<br>PSTS3 YP_177768 |                 |                  | GTAVKAFLQSTIGAG |
| POSSIBLE GLYCOSYL TRANSFERASE CAB05415                       | FGVRLVKLLYRLERP | FGVRLVKLLYRLERP  | FGVRLVKLLYRLERP |
| POSSIBLE GLYCOSYL TRANSFERASE CAB05415                       | FRHHAIHTIPSERFF | FRHHAIHTIPSERFF  | FRHHAIHTIPSERFF |
| POSSIBLE GLYCOSYL TRANSFERASE CAB05415                       | LLRTERLKSQRVAGA | LLRTERLKSQRVAGA  | LLRTERLKSQRVAGA |
| POSSIBLE GLYCOSYL TRANSFERASE CAB05415                       |                 |                  | LRVLDEIAPDLVVGD |
| POSSIBLE GLYCOSYL TRANSFERASE CAB05415                       | PSERFFGNLTQGRFY | PSERFFGNLTQGRFY  | PSERFFGNLTQGRFY |
| POSSIBLE GLYCOSYL TRANSFERASE CAB05415                       | RHGLSSLGWNLCRIF | RHGLSSLGWNLCRIF  |                 |
| POSSIBLE GLYCOSYL TRANSFERASE CAB05415                       | RLVKLLYRLERPLLF | RLVKLLYRLERPLLF  | RLVKLLYRLERPLLF |
| POSSIBLE GLYCOSYL TRANSFERASE CAB05418                       | ALAAGVPVIGLPSNM |                  | ALAAGVPVIGLPSNM |
| POSSIBLE GLYCOSYL TRANSFERASE CAB05418                       | EVLLKIAQGRLFYNT | EVLLKIAQGRLFYNT  | EVLLKIAQGRLFYNT |
| POSSIBLE GLYCOSYL TRANSFERASE CAB05418                       | RKYIAADRKILNEIA | RKYIAADRKILNEIA  | RKYIAADRKILNEIA |
| POSSIBLE GLYCOSYL TRANSFERASE CAB05418                       | RRFPLDPVPWTRFFG |                  | RRFPLDPVPWTRFFG |
| POSSIBLE GLYCOSYL TRANSFERASE CAB05418                       | TQQALAAGVPVIGLP |                  | TQQALAAGVPVIGLP |
| POSSIBLE GLYCOSYL TRANSFERASE CAB05418                       |                 |                  | WSPQARRRFPDPVP  |
| POSSIBLE GLYCOSYL TRANSFERASE CAB05419                       |                 |                  | FSIIPTLNVAAVLP  |
| POSSIBLE HEMOLYSIN CAA16235                                  |                 | RVVVRTGRASARGLI  |                 |
| POSSIBLE HEMOLYSIN-LIKE PROTEIN CAA17201                     | AAPRSVGVPLYLLLG | AAPRSVGVPLYLLLG  | AAPRSVGVPLYLLLG |

|                                          |                  |                  |
|------------------------------------------|------------------|------------------|
| POSSIBLE HEMOLYSIN-LIKE PROTEIN CAA17201 | VLAGASLVAVSWAVG  |                  |
| PPE FAMILY PROTEIN CAE55334              | AFAMTVPPSLVAANR  | AFAMTVPPSLVAANR  |
| PPE FAMILY PROTEIN CAE55334              |                  | ELTSAAVSYGSVVST  |
| PPE FAMILY PROTEIN CAE55334              |                  | GGAAPVSAGVGHAAL  |
| PPE FAMILY PROTEIN CAE55334              |                  | GLLPPEVNSSRMYSG  |
| PPE FAMILY PROTEIN CAE55334              |                  | HIGLYGNAGGLGPTQ  |
| PPE FAMILY PROTEIN CAE55334              |                  | VAAELTSAAVSYGSV  |
| PPE FAMILY PROTEIN CAE55371              | AENRAELMILIATNL  | AENRAELMILIATNL  |
| PPE FAMILY PROTEIN CAE55371              |                  | AVQTAAQNGVRAMSS  |
| PPE FAMILY PROTEIN CAE55371              |                  | LIATNLLGQNTPAIA  |
| PPE FAMILY PROTEIN CAE55371              |                  | MSSLGSSLGSSGLGG  |
| PPE FAMILY PROTEIN CAE55371              |                  | VGSWIGSSAGLMVAA  |
| PPE FAMILY PROTEIN CAE55371              |                  | YVAWMSVTAGQAELT  |
| PPE FAMILY PROTEIN CAE55489              |                  | PIAHSTVLVAPVSPS  |
| PPE FAMILY PROTEIN CAE55489              | WRSLDVEMTAVQRSF  | WRSLDVEMTAVQRSF  |
| PPE FAMILY PROTEIN CAE55504              | ANRTRLASLVAANLL  |                  |
| PPE FAMILY PROTEIN CAE55504              |                  | FEATLAATVSPAMVA  |
| PPE FAMILY PROTEIN CAE55504              |                  | FEATLAATVSPAMVA  |
| PPE FAMILY PROTEIN CAE55504              |                  | FGKPANPDVLVVGNG  |
| PPE FAMILY PROTEIN CAE55504              |                  | FSIPQLGFTLSGATP  |
| PPE FAMILY PROTEIN CAE55504              | GFTLSGATPADAYPT  |                  |
| PPE FAMILY PROTEIN CAE55504              | GNPLADLIQPDRLVL  |                  |
| PPE FAMILY PROTEIN CAE55504              |                  | IGNIGDRNLGIGNTG  |
| PPE FAMILY PROTEIN CAE55504              |                  | LNSLTYDVSV AQGVT |
| PPE FAMILY PROTEIN YP_177963             |                  | AIPLTSATLGGLALP  |
| PPE FAMILY PROTEIN YP_177963             | AMSNLLGQNAAAIAA  |                  |
| PPE FAMILY PROTEIN YP_177963             |                  | GFTIPGGTLIPQLPL  |
| PPE FAMILY PROTEIN YP_177963             |                  | GLAAGLAGMGNIGLG  |
| PPE FAMILY PROTEIN YP_177963             |                  | IGPATIIPPIHIPSI  |
| PPE FAMILY PROTEIN YP_177963             | LALNISVPDSSVPPII |                  |
| PPE FAMILY PROTEIN YP_177963             | LNLGSGLSGIYNTST  |                  |
| PPE FAMILY PROTEIN YP_177963             |                  | LSGIYNTSTLPLGTP  |
| PPE FAMILY PROTEIN YP_177963             | LTGDNQGTGIGGLNSG |                  |
| PPE FAMILY PROTEIN YP_177963             | NISVPDSSVPIIIVP  |                  |

|                                                                              |                  |                  |                  |
|------------------------------------------------------------------------------|------------------|------------------|------------------|
| PPE FAMILY PROTEIN YP_177963                                                 |                  |                  | NQSLIINLGLADVGS  |
| PPE FAMILY PROTEIN YP_177963                                                 | PGIGNTTTTVPSSGFF | PGIGNTTTTVPSSGFF |                  |
| PPE FAMILY PROTEIN YP_177963                                                 |                  |                  | PPITIDRIPLNLGAS  |
| PPE FAMILY PROTEIN YP_177963                                                 |                  |                  | SGIPTLSTTGPVHAV  |
| PPE FAMILY PROTEIN YP_177963                                                 |                  | SIIDIPALPGFGNST  |                  |
| PPE FAMILY PROTEIN YP_177963                                                 |                  |                  | STGMSGGFVTAPTQG  |
| PPE FAMILY PROTEIN YP_177963                                                 | TIFPNGISIPNNPLA  |                  | TIFPNGISIPNNPLA  |
| PPE FAMILY PROTEIN YP_177963                                                 | VDISGMFNVSTLGSA  |                  | VDISGMFNVSTLGSA  |
| PPE FAMILY PROTEIN YP_177963                                                 |                  |                  | VGEQLSGLSSAGTAL  |
| PPE FAMILY PROTEIN YP_177963                                                 |                  |                  | VTIPTITTSPIPLKI  |
| PROBABLE CUTINASE PRECURSOR CFP21 NP_216500                                  |                  |                  | SQGATVIDLSTTSAMP |
| PROBABLE CUTINASE PRECURSOR CFP21 NP_216500                                  |                  |                  | YPASDDYRASASNGS  |
| PROBABLE ISOCITRATE DEHYDROGENASE CAA16247                                   | AFFPDYLTTEEQRVPD |                  |                  |
| PROBABLE ISOCITRATE DEHYDROGENASE CAA16247                                   |                  |                  | CERLVRGLDTIAATG  |
| PROBABLE ISOCITRATE DEHYDROGENASE CAA16247                                   |                  |                  | GKLDKTKAVNPESTF  |
| PROBABLE ISOCITRATE DEHYDROGENASE CAA16247                                   | GLSDLYSKIESLPAS  |                  | GLSDLYSKIESLPAS  |
| PROBABLE ISOCITRATE DEHYDROGENASE CAA16247                                   | HPIVFGHAVRIFYKD  | HPIVFGHAVRIFYKD  | HPIVFGHAVRIFYKD  |
| PROBABLE ISOCITRATE DEHYDROGENASE CAA16247                                   |                  |                  | KDTKAVNPESTFSRI  |
| PROBABLE ISOCITRATE DEHYDROGENASE CAA16247                                   |                  |                  | NLAELGRLTQLPDTN  |
| PROBABLE ISOCITRATE DEHYDROGENASE CAA16247                                   |                  |                  | PHENELIKKVKTYLK  |
| PROBABLE ISOCITRATE DEHYDROGENASE CAA16247                                   | QLPDTNIIKLPNISA  | QLPDTNIIKLPNISA  | QLPDTNIIKLPNISA  |
| PROBABLE ISOCITRATE DEHYDROGENASE CAA16247                                   | SPSRKTGELDNRRGSQ |                  | SPSRKTGELDNRRGSQ |
| PROBABLE ISOCITRATE DEHYDROGENASE CAA16247                                   |                  |                  | VPDNLAEGLRLTQLP  |
| PROBABLE ISOCITRATE DEHYDROGENASE CAA17111                                   |                  | GTVTRHYRQYQAGKP  | GTVTRHYRQYQAGKP  |
| PROBABLE ISOCITRATE DEHYDROGENASE CAA17111                                   |                  | REPIVISNVPRLVPG  | REPIVISNVPRLVPG  |
| PROBABLE ISOCITRATE DEHYDROGENASE CAA17111                                   |                  |                  | YQAGKPTSTNPIASI  |
| PROBABLE LIPOPROTEIN LPRJ CAB10947                                           |                  |                  | DGTRTWRTGRQATTL  |
| PROBABLE LIPOPROTEIN LPRJ CAB10947                                           |                  |                  | LALLAGVFGGAASCA  |
| PROBABLE LIPOPROTEIN LPRJ CAB10947                                           |                  |                  | MMGNAFLTALTNAGI  |
| PROBABLE LIPOPROTEIN LPRJ CAB10947                                           |                  |                  | QPATTVALGRSVCMP  |
| PROBABLE LIPOPROTEIN LPRJ CAB10947                                           | TTVALGRSVCMPVVA  |                  | TTVALGRSVCMPVVA  |
| PROBABLE MOLYBDOPTERIN-GUANINE<br>DINUCLEOTIDE BIOSYNTHESIS PROTEIN CAA16030 |                  |                  | CAPVFMMAAPGQPLP  |

|                                                                              |                 |                 |                 |
|------------------------------------------------------------------------------|-----------------|-----------------|-----------------|
| PROBABLE MOLYBDOPTERIN-GUANINE<br>DINUCLEOTIDE BIOSYNTHESIS PROTEIN CAA16030 |                 | DALRIVMADSRPLTN | DALRIVMADSRPLTN |
| PROBABLE MOLYBDOPTERIN-GUANINE<br>DINUCLEOTIDE BIOSYNTHESIS PROTEIN CAA16030 |                 |                 | GQRCAPVFMMAAPGQ |
| PROBABLE MOLYBDOPTERIN-GUANINE<br>DINUCLEOTIDE BIOSYNTHESIS PROTEIN CAA16030 | GVRlafvCAVDMPYL |                 | GVRlafvCAVDMPYL |
| PROBABLE MOLYBDOPTERIN-GUANINE<br>DINUCLEOTIDE BIOSYNTHESIS PROTEIN CAA16030 |                 |                 | LVEHMGILGQRCAP  |
| PROBABLE MOLYBDOPTERIN-GUANINE<br>DINUCLEOTIDE BIOSYNTHESIS PROTEIN CAA16030 |                 |                 | TLPVPVLRDELPLGL |
| PROBABLE MOLYBDOPTERIN-GUANINE<br>DINUCLEOTIDE BIOSYNTHESIS PROTEIN CAA16030 |                 |                 | TTTLVEHMGILGQR  |
| PROBABLE MOLYBDOPTERIN-GUANINE<br>DINUCLEOTIDE BIOSYNTHESIS PROTEIN CAA16030 |                 |                 | YRTDLADRVDTLVGA |
| PROBABLE SERINE PROTEASE PEPA CAB09453                                       |                 |                 | GVDVVGYDRTQDVAV |
| PROBABLE SERINE PROTEASE PEPA CAB09453                                       | INAFsvGSGQTYGVD |                 | INAFsvGSGQTYGVD |
| PROBABLE SERINE PROTEASE PEPA CAB09453                                       |                 |                 | LQLRGAGGLPSAAIG |
| PROBABLE SERINE PROTEASE PEPA CAB09453                                       |                 |                 | LTNNHVIAGATDINA |
| PROBABLE SERINE PROTEASE PEPA CAB09453                                       | QTYGVDVVGYDRTQD |                 | QTYGVDVVGYDRTQD |
| PROBABLE SERINE PROTEASE PEPD CAA17582                                       |                 |                 | AAKVVPSVVMLETDL |
| PROBABLE SERINE PROTEASE PEPD CAA17582                                       |                 |                 | AAPSIPAANMPPGSV |
| PROBABLE SERINE PROTEASE PEPD CAA17582                                       |                 |                 | AASAAPSIPAANMPP |
| PROBABLE SERINE PROTEASE PEPD CAA17582                                       |                 |                 | EQVAAKVVPSVVMLE |
| PROBABLE SERINE PROTEASE PEPD CAA17582                                       |                 |                 | FQDPSGGSRVTVL   |
| PROBABLE SERINE PROTEASE PEPD CAA17582                                       |                 |                 | GAAASLVGFNRAPAG |
| PROBABLE SERINE PROTEASE PEPD CAA17582                                       |                 |                 | IGSPLGLEGTVTTGI |
| PROBABLE SERINE PROTEASE PEPD CAA17582                                       |                 |                 | LGSSSDLRVGQPVLA |
| PROBABLE SERINE PROTEASE PEPD CAA17582                                       |                 |                 | PLGLEGTVTTGIVSA |
| PROBABLE SERINE PROTEASE PEPD CAA17582                                       |                 |                 | RVQGVSGLTPISLGS |
| PUTATIVE CYCLOPROPANE-FATTY-ACYL-<br>PHOSPHOLIPID SYNTHASE UFAA1 NP_854118   | EQQLARQRVAAAGF  | EQQLARQRVAAAGF  | EQQLARQRVAAAGF  |
| PUTATIVE CYCLOPROPANE-FATTY-ACYL-<br>PHOSPHOLIPID SYNTHASE UFAA1 NP_854118   | FRSGYLDVYQWTLIR | FRSGYLDVYQWTLIR | FRSGYLDVYQWTLIR |
| PUTATIVE CYCLOPROPANE-FATTY-ACYL-<br>PHOSPHOLIPID SYNTHASE UFAA1 NP_854118   |                 |                 | LVYSDGTATGAADPR |
| RNA POLYMERASE BETA-SUBUNIT AAA21416                                         | GAPNRVsfAKLREPL |                 |                 |
| RNA POLYMERASE BETA-SUBUNIT AAA21416                                         |                 |                 | GLTHKRRLSALGPGG |
| RNA POLYMERASE BETA-SUBUNIT AAA21416                                         |                 |                 | LQELLTIKSDDTVGR |

|                                                                 |                 |                 |                 |
|-----------------------------------------------------------------|-----------------|-----------------|-----------------|
| RNA POLYMERASE BETA-SUBUNIT AAA21416                            |                 |                 | NMQRQAVPLVRSEAP |
| RNA POLYMERASE BETA-SUBUNIT AAA21416                            | NRVSFAKLREPLEVP |                 |                 |
| RNA POLYMERASE BETA-SUBUNIT AAA21416                            | QGLLSCTLPNRDGDV |                 |                 |
| RNA POLYMERASE BETA-SUBUNIT AAA21416                            | VEYVPSSEVDYMDVS | VEYVPSSEVDYMDVS | VEYVPSSEVDYMDVS |
| RNA POLYMERASE BETA-SUBUNIT AAA21416                            |                 |                 | YVAQKRKISDGDKLA |
| SECRETED ANTIGEN 85-B FBPB (85B) CAB10044                       | AVVLPGLVGLAGGAA |                 |                 |
| SECRETED ANTIGEN 85-B FBPB (85B) CAB10044                       |                 |                 | LPVEYLQVPSPSMGR |
| SECRETED ANTIGEN 85-B FBPB (85B) CAB10044                       |                 | QSGLSIVMPVGGQSS |                 |
| SECRETED ANTIGEN 85-B FBPB (85B) CAB10044                       | QSSFYSDWYSPACGK |                 | QSSFYSDWYSPACGK |
| SECRETED ANTIGEN 85-B FBPB (85B) CAB10044                       |                 |                 | TAAAVVLPGLVGLAG |
| SECRETED L-ALANINE DEHYDROGENASE ALD CAA15575                   | PTTYDHPTFAVHDTL | PTTYDHPTFAVHDTL | PTTYDHPTFAVHDTL |
| SECRETED L-ALANINE DEHYDROGENASE ALD CAA15575                   |                 |                 | SAITDADFKAAGAQL |
| SECRETED L-ALANINE DEHYDROGENASE ALD CAA15575                   |                 |                 | VGTADQVWADADLLL |
| SECRETED L-ALANINE DEHYDROGENASE ALD CAA15575                   | VKRADLVIGAVLVPG |                 | VKRADLVIGAVLVPG |
| TRANSMEMBRANE SERINE/THREONINE-PROTEIN KINASE D PKND NP_215446  | ASDFAYLVDFGIARA |                 |                 |
| TRANSMEMBRANE SERINE/THREONINE-PROTEIN KINASE D PKND NP_215446  | LLKQYGPLTPARAVA | LLKQYGPLTPARAVA | LLKQYGPLTPARAVA |
| TRANSMEMBRANE SERINE/THREONINE-PROTEIN KINASE D PKND NP_215446  |                 |                 | LVLRPSWSPTQASGQ |
| TRANSMEMBRANE SERINE/THREONINE-PROTEIN KINASE D PKND NP_215446  |                 |                 | PALDQVIKGMKNP   |
| TRANSMEMBRANE SERINE/THREONINE-PROTEIN KINASE D PKND NP_215446  | TGDEVTYRADIYALA | TGDEVTYRADIYALA | TGDEVTYRADIYALA |
| TRANSMEMBRANE SERINE/THREONINE-PROTEIN KINASE D PKND NP_215446  | TVLPFTGLNTPLAVA | TVLPFTGLNTPLAVA | TVLPFTGLNTPLAVA |
| TRANSMEMBRANE SERINE/THREONINE-PROTEIN KINASE D PKND NP_215446  | VYVADRGNNRVVKLA | VYVADRGNNRVVKLA | VYVADRGNNRVVKLA |
| TRANSMEMBRANE SERINE/THREONINE-PROTEIN KINASE D PKND NP_215446  | YPEGLAVDTQGAVYV |                 |                 |
| TWO COMPONENT TRANSCRIPTIONAL REGULATORY PROTEIN DEVR NP_217649 |                 | TSYTSDEAMLDAILA |                 |
